# Supplementary material for: Evidence-based objective performance criteria for the evaluation of hip and knee replacement devices and technologies
Source: PubMed Central journal article supplement — Int J Surg. 2023 Apr 10;109(5):1125–35. doi: 10.1097/JS9.0000000000000169 (PMC10389375; doi:10.1097/js9.0000000000000169), 2023-04-10
Supplement: js9-109-1125-s002.pdf [file js9-109-1125-s002.pdf]

# Supplementary Figure 1: Flow chart: Literature review

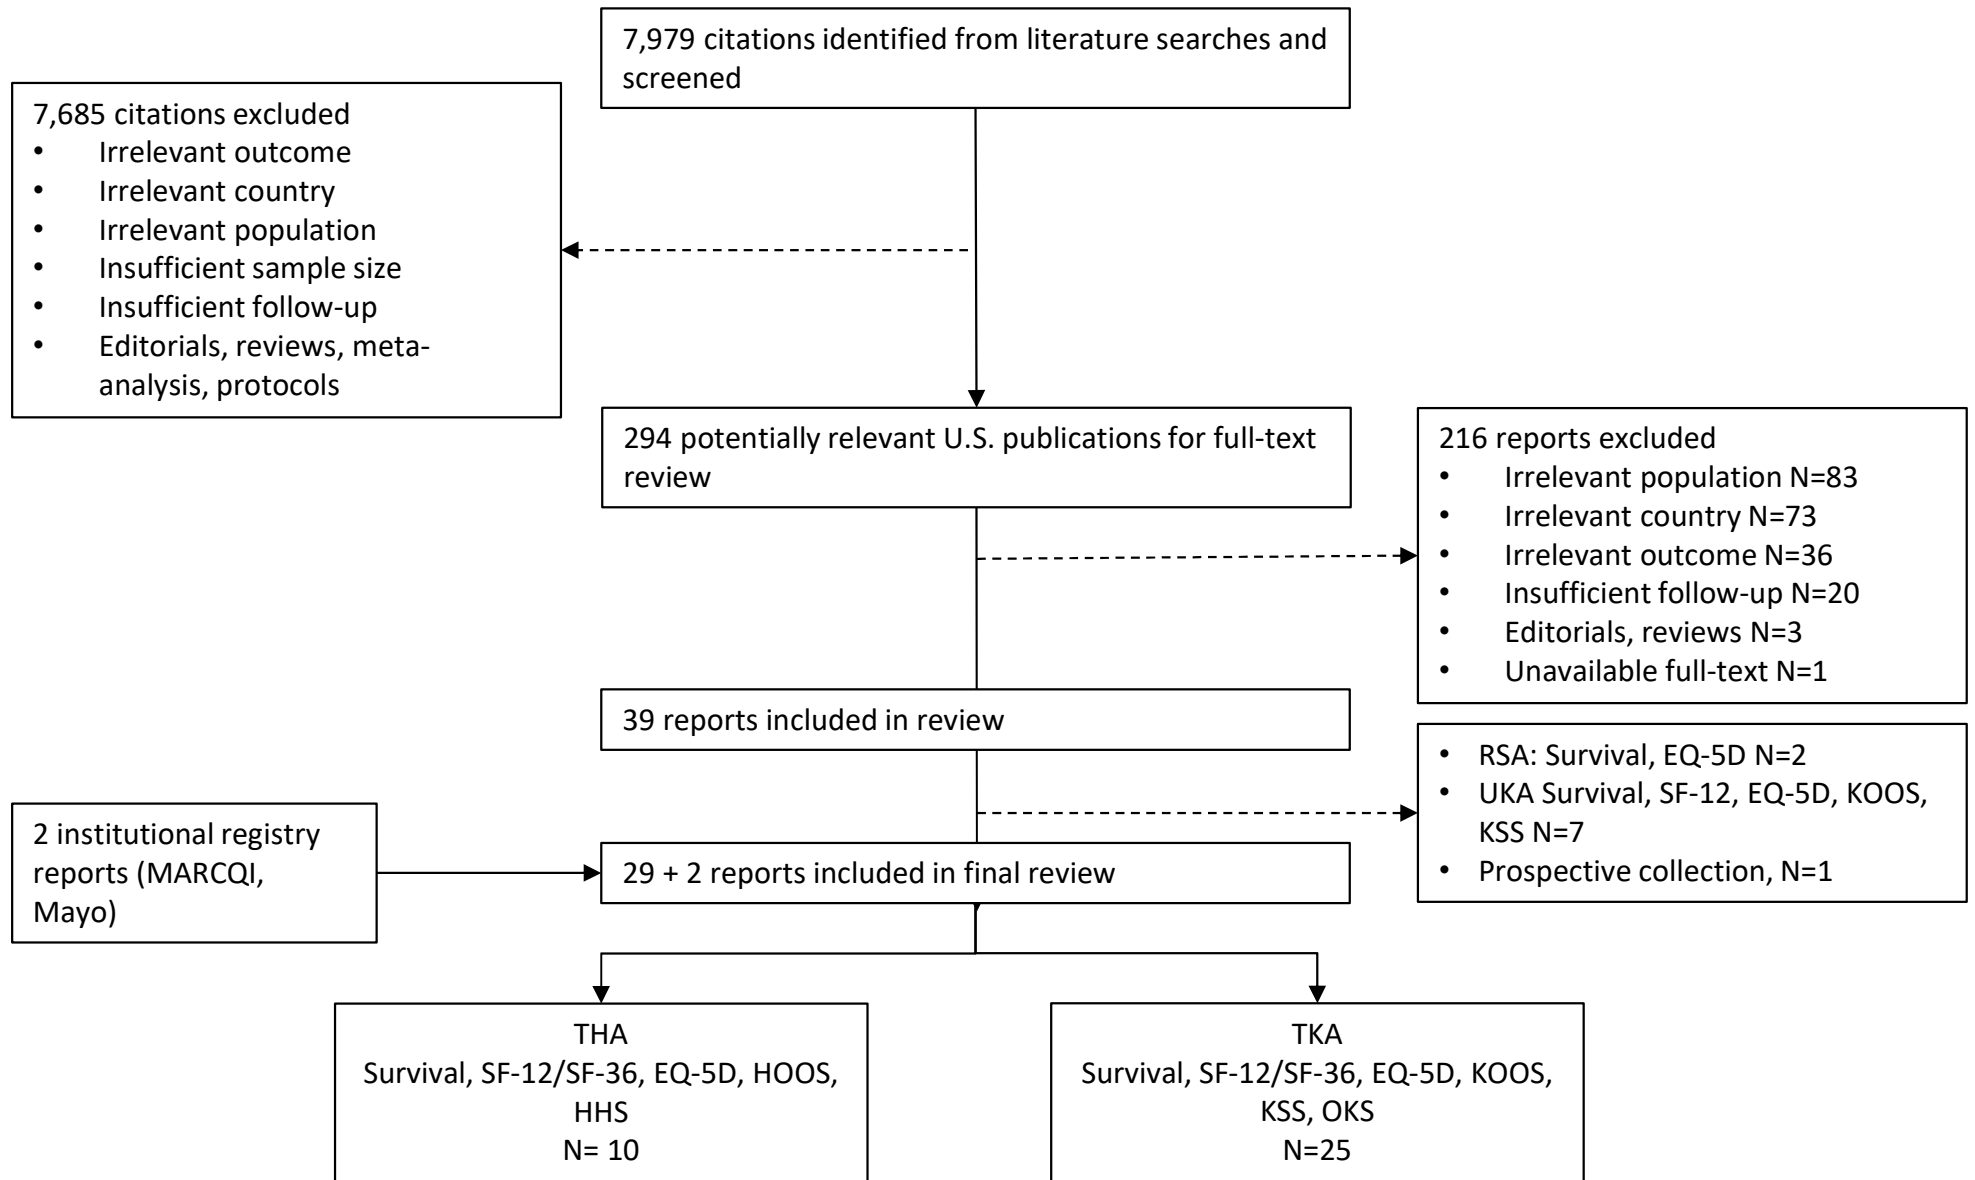

Note: 3 studies and 2 institutional reports had both THA And TKA estimates and are counted in the both THA and TKA boxes.

Abbreviations: MARCQI, Michigan Arthroplasty Registry Collaborative Quality Initiative; RSA, Resurfacing Hip Arthroplasty; and UKA, Unicondylar Knee Arthroplasty.

## Supplementary Figure 2: Flow chart: Kaiser Permanente registry data patient selection for hip and knee arthroplasty

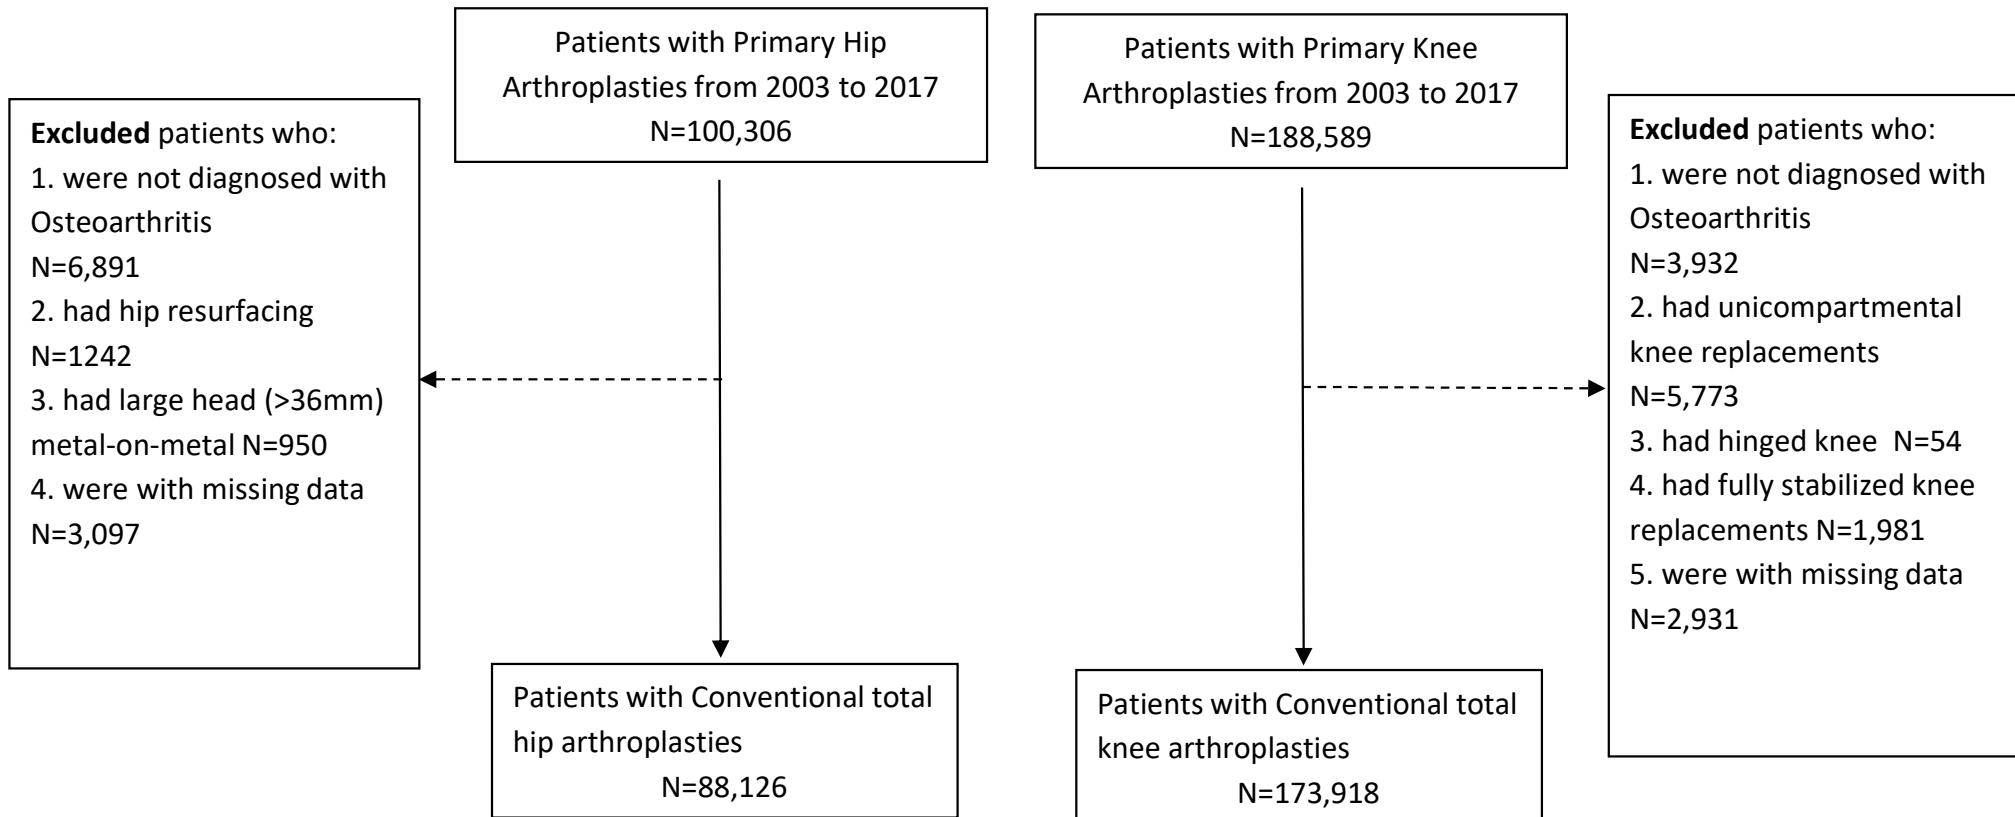

# Supplementary Figure 3: Flow chart: New York and California statewide claims data patient selection for hip arthroplasty

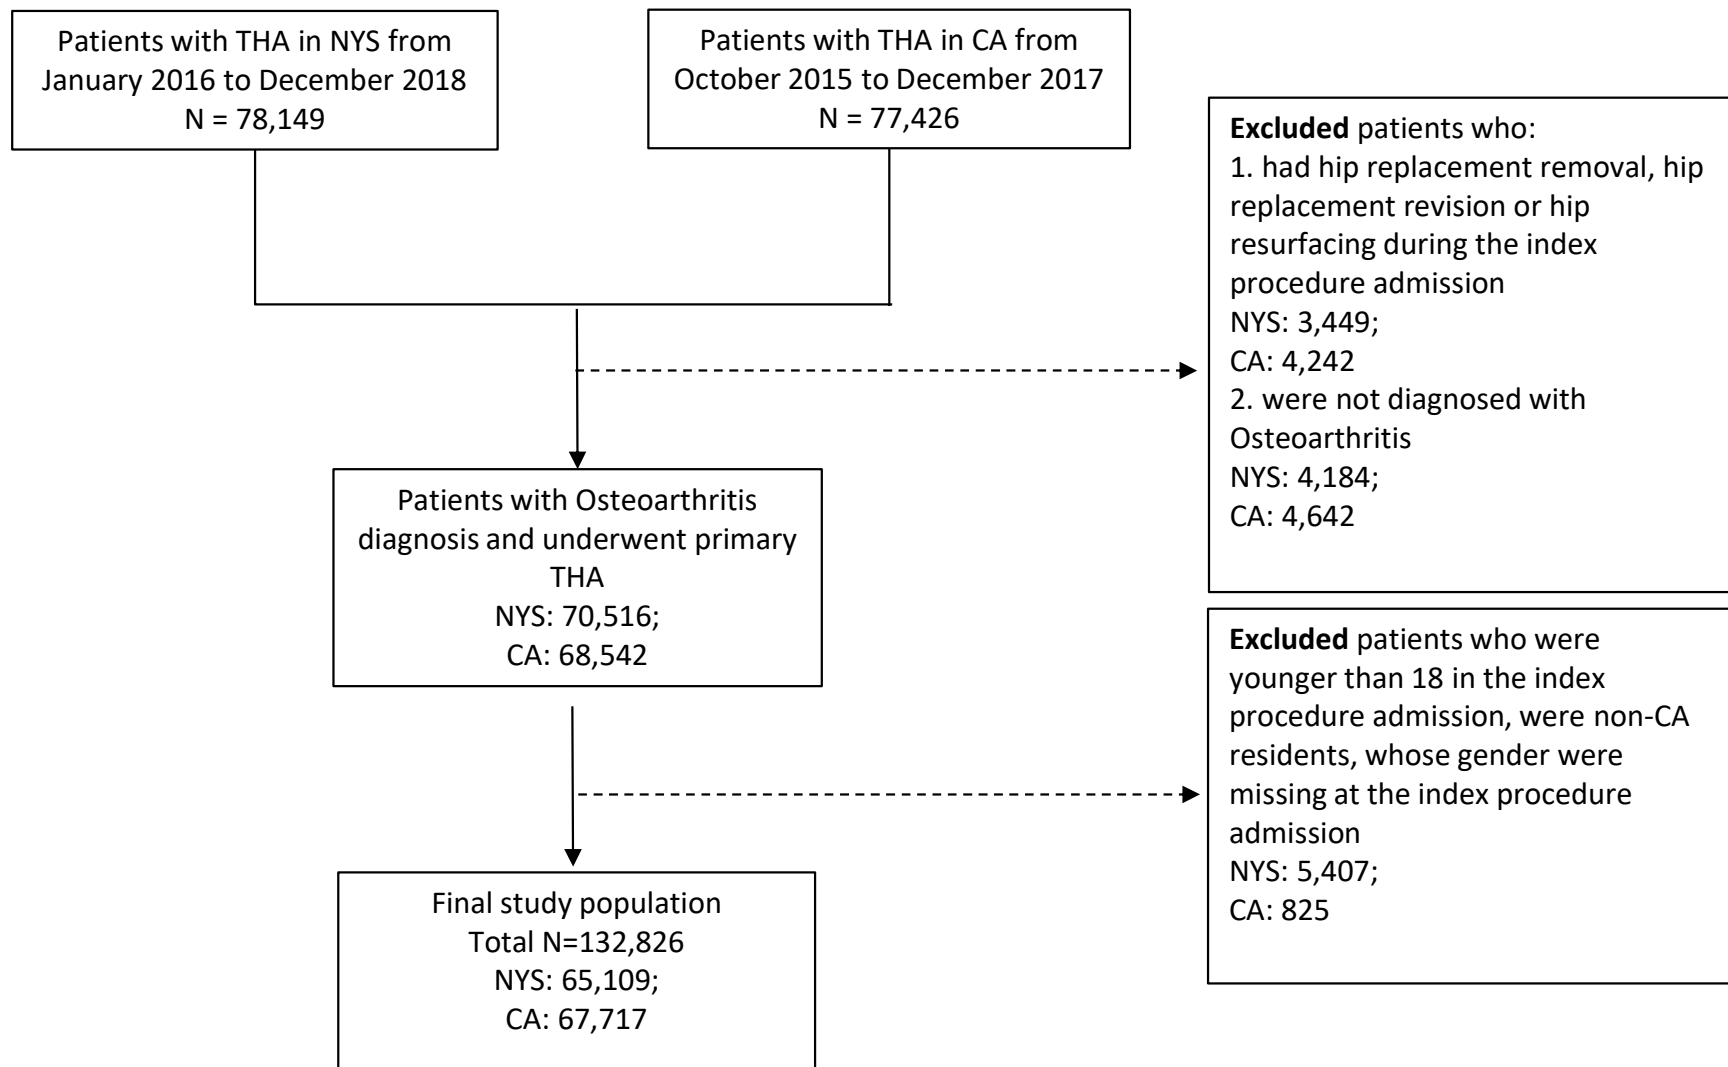

# Supplementary Figure 4: Flow chart: New York and California statewide claims data patient selection for knee arthroplasty

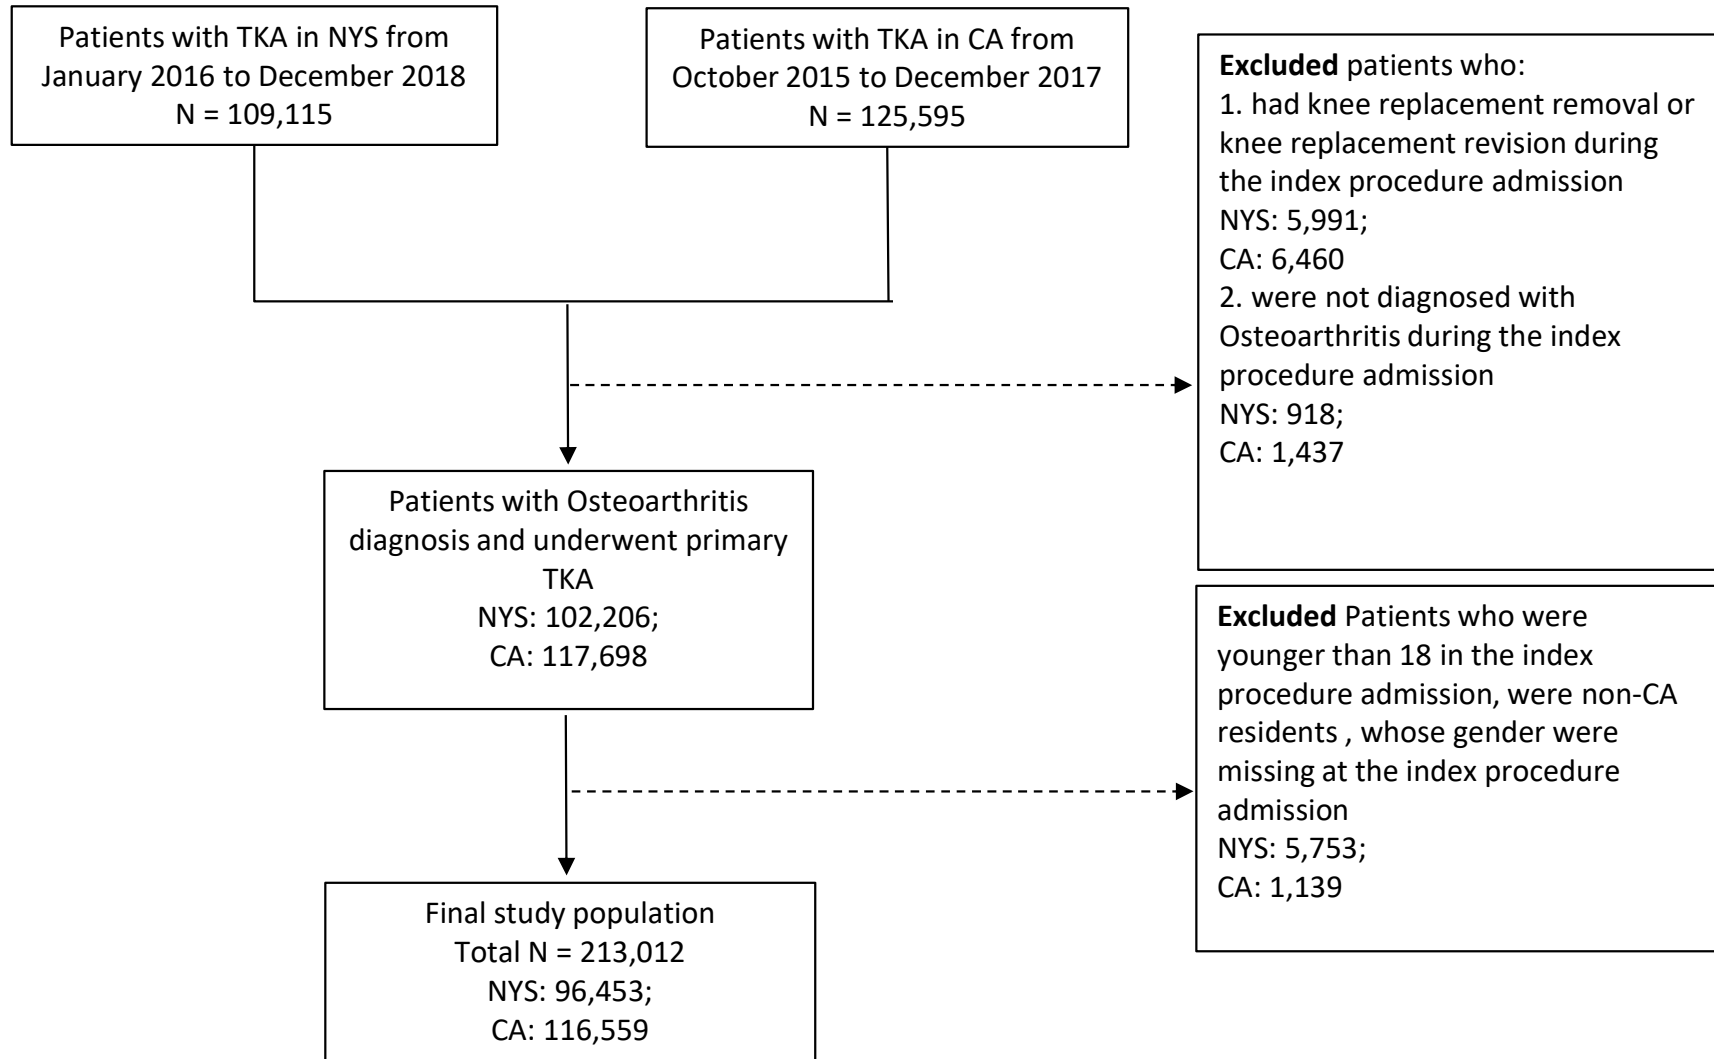

Systematic Review-registratie bij <https://www.crd.york.ac.uk/prospero/>

Reguliere referenties - totaal d.d. 17-1-2020: 10.156 referenties [totaal incl. duplicaten: 28.956], afkomstig uit:

- PubMed: 7.857
- MEDLINE (OVID): 7.842 - 3 uniek
- Embase: 6.238 - 1.394 uniek
- Emcare: 4.256 - 138 uniek
- Web of Science: 2.253 - 665 uniek
- COCHRANE Library: 510 - 99 uniek

Excl. meeting abstract referenties.

Databases:

**PubMed**

<http://www.ncbi.nlm.nih.gov/pubmed?otool=leiden>

**14-1-2020**

((("Hip Prosthesis"[majr] OR "Arthroplasty, Replacement, Hip"[majr] OR "Hip prosthesis"[ti] OR "Hip prostheses"[ti] OR "Hip Replacement"[ti] OR "Hip Replacements"[ti] OR "Hip Arthroplasty"[ti] OR "Hip Arthroplasties"[ti] OR "Hip joint prosthesis"[ti] OR "Hip joint prostheses"[ti] OR "Hip joint Replacement"[ti] OR "Hip joint Replacements"[ti] OR "Hip joint Arthroplasty"[ti] OR "Hip joint Arthroplasties"[ti] OR "total hip"[ti] OR "total hips"[ti] OR "THR"[ti] OR "THA"[ti] OR "Knee Prosthesis"[majr] OR "Arthroplasty, Replacement, Knee"[majr] OR "Knee prosthesis"[ti] OR "Knee prostheses"[ti] OR "Knee Replacement"[ti] OR "Knee Replacements"[ti] OR "Knee Arthroplasty"[ti] OR "Knee Arthroplasties"[ti] OR "Knee joint prosthesis"[ti] OR "Knee joint prostheses"[ti] OR "Knee joint Replacement"[ti] OR "Knee joint Replacements"[ti] OR "Knee joint Arthroplasty"[ti] OR "Knee joint Arthroplasties"[ti] OR "total Knee"[ti] OR "total Knees"[ti] OR "TKR"[ti] OR "TKA"[ti] OR ("knee"[ti] OR "knees"[ti] OR "hip"[ti] OR "hips"[ti]) AND ("prosthesis"[ti] OR "prostheses"[ti] OR "Replacement"[ti] OR "Replacements"[ti] OR "Arthroplasty"[ti] OR "Arthroplasties"[ti])) OR "Joint Prosthesis"[majr:noexp] OR "Arthroplasty, Replacement"[majr:noexp] OR "Joint prosthesis"[ti] OR "Joint prostheses"[ti] OR "Joint Replacement"[ti] OR "Joint Replacements"[ti] OR "Joint Arthroplasty"[ti] OR "Joint Arthroplasties"[ti]) AND ("Patient Reported Outcome Measures"[mesh] OR "Patient Reported Outcome Measures"[tiab] OR "Patient Reported Outcome Measure"[tiab] OR "PROM"[tiab] OR "PROMS"[tiab] OR "Mortality"[mesh] OR "mortality"[Subheading] OR "Survival Analysis"[mesh] OR "Survival Rate"[mesh] OR "Disease-Free Survival"[mesh] OR "Progression-Free Survival"[mesh] OR "Kaplan-Meier Estimate"[mesh] OR "Prosthesis Failure"[mesh] OR "mortality"[tiab] OR "Survival"[tiab] OR "Kaplan-Meier"[tiab] OR "Failure"[tiab] OR "Postoperative Complications"[mesh] OR "Intraoperative Complications"[mesh] OR postoperativ\*[tiab] OR intraoperativ\*[tiab] OR "complication"[tiab] OR "complications"[tiab] OR "Joint

Dislocations"[mesh] OR dislocat\*[tiab] OR "Fractures, Bone"[mesh] OR fractur\*[tiab]) AND ("Registries"[Mesh] OR "Registries"[tiab] OR "Registry"[tiab] OR "register"[tiab] OR "registers"[tiab]) NOT ("Case Reports"[ptyp] OR "case report"[ti] OR "Review"[ptyp] OR "review"[ti] OR "editorial"[ptyp] OR "comment"[ptyp] OR "editorial"[ti] OR "comment"[ti])) OR (("Hip Prosthesis"[majr] OR "Arthroplasty, Replacement, Hip"[majr] OR "Hip prosthesis"[ti] OR "Hip prostheses"[ti] OR "Hip Replacement"[ti] OR "Hip Replacements"[ti] OR "Hip Arthroplasty"[ti] OR "Hip Arthroplasties"[ti] OR "Hip joint prosthesis"[ti] OR "Hip joint prostheses"[ti] OR "Hip joint Replacement"[ti] OR "Hip joint Replacements"[ti] OR "Hip joint Arthroplasty"[ti] OR "Hip joint Arthroplasties"[ti] OR "total hip"[ti] OR "total hips"[ti] OR "THR"[ti] OR "THA"[ti] OR "Knee Prosthesis"[majr] OR "Arthroplasty, Replacement, Knee"[majr] OR "Knee prosthesis"[ti] OR "Knee prostheses"[ti] OR "Knee Replacement"[ti] OR "Knee Replacements"[ti] OR "Knee Arthroplasty"[ti] OR "Knee Arthroplasties"[ti] OR "Knee joint prosthesis"[ti] OR "Knee joint prostheses"[ti] OR "Knee joint Replacement"[ti] OR "Knee joint Replacements"[ti] OR "Knee joint Arthroplasty"[ti] OR "Knee joint Arthroplasties"[ti] OR "total Knee"[ti] OR "total Knees"[ti] OR "TKR"[ti] OR "TKA"[ti] OR ("knee"[ti] OR "knees"[ti] OR "hip"[ti] OR "hips"[ti]) AND ("prosthesis"[ti] OR "prostheses"[ti] OR "Replacement"[ti] OR "Replacements"[ti] OR "Arthroplasty"[ti] OR "Arthroplasties"[ti])) AND ("Patient Reported Outcome Measures"[mesh] OR "Patient Reported Outcome Measures"[tiab] OR "Patient Reported Outcome Measure"[tiab] OR "PROM"[tiab] OR "PROMS"[tiab] OR "Mortality"[mesh] OR "mortality"[Subheading] OR "Survival Analysis"[mesh] OR "Survival Rate"[mesh] OR "Disease-Free Survival"[mesh] OR "Progression-Free Survival"[mesh] OR "Kaplan-Meier Estimate"[mesh] OR "Prosthesis Failure"[mesh] OR "mortality"[tiab] OR "Survival"[tiab] OR "Kaplan-Meier"[tiab] OR "Failure"[tiab] OR "Postoperative Complications"[mesh] OR "Intraoperative Complications"[mesh] OR postoperativ\*[tiab] OR intraoperativ\*[tiab] OR "complication"[tiab] OR "complications"[tiab] OR "Joint Dislocations"[mesh] OR dislocat\*[tiab] OR "Fractures, Bone"[mesh] OR fractur\*[tiab]) AND ("Prospective Studies"[Mesh] OR Prospectiv\*[tiab]) NOT ("Case Reports"[ptyp] OR "case report"[ti] OR "Review"[ptyp] OR "review"[ti] OR "editorial"[ptyp] OR "comment"[ptyp] OR "editorial"[ti] OR "comment"[ti]))))

### MEDLINE via OVID

<http://gateway.ovid.com/ovidweb.cgi?T=JS&MODE=ovid&NEWS=n&PAGE=main&D=medall>

((exp \*"Hip Prosthesis"/ OR exp \*"Arthroplasty, Replacement, Hip"/ OR "Hip prosthesis".ti OR "Hip prostheses".ti OR "Hip Replacement".ti OR "Hip Replacements".ti OR "Hip Arthroplasty".ti OR "Hip Arthroplasties".ti OR "Hip joint prosthesis".ti OR "Hip joint prostheses".ti OR "Hip joint Replacement".ti OR "Hip joint Replacements".ti OR "Hip joint Arthroplasty".ti OR "Hip joint Arthroplasties".ti OR "total hip".ti OR "total hips".ti OR "THR".ti OR "THA".ti OR exp \*"Knee Prosthesis"/ OR exp \*"Arthroplasty, Replacement, Knee"/ OR "Knee prosthesis".ti OR "Knee prostheses".ti OR "Knee Replacement".ti OR "Knee Replacements".ti OR "Knee Arthroplasty".ti OR "Knee Arthroplasties".ti OR "Knee joint prosthesis".ti OR "Knee joint prostheses".ti OR

"Knee joint Replacement".ti OR "Knee joint Replacements".ti OR "Knee joint Arthroplasty".ti OR "Knee joint Arthroplasties".ti OR "total Knee".ti OR "total Knees".ti OR "TKR".ti OR "TKA".ti OR (("knee".ti OR "knees".ti OR "hip".ti OR "hips".ti) AND ("prosthesis".ti OR "prostheses".ti OR "Replacement".ti OR "Replacements".ti OR "Arthroplasty".ti OR "Arthroplasties".ti)) OR \*"Joint Prosthesis"/ OR \*"Arthroplasty, Replacement"/ OR "Joint prosthesis".ti OR "Joint prostheses".ti OR "Joint Replacement".ti OR "Joint Replacements".ti OR "Joint Arthroplasty".ti OR "Joint Arthroplasties".ti) AND (exp "Patient Reported Outcome Measures"/ OR "Patient Reported Outcome Measures".ti,ab OR "Patient Reported Outcome Measure".ti,ab OR "PROM".ti,ab OR "PROMS".ti,ab OR exp "Mortality"/ OR "mortality".fs OR exp "Survival Analysis"/ OR exp "Survival Rate"/ OR exp "Disease-Free Survival"/ OR exp "Progression-Free Survival"/ OR exp "Kaplan-Meier Estimate"/ OR exp "Prosthesis Failure"/ OR "mortality".ti,ab OR "Survival".ti,ab OR "Kaplan-Meier".ti,ab OR "Failure".ti,ab OR exp "Postoperative Complications"/ OR exp "Intraoperative Complications"/ OR postoperativ\*.ti,ab OR intraoperativ\*.ti,ab OR "complication".ti,ab OR "complications".ti,ab OR exp "Joint Dislocations"/ OR dislocat\*.ti,ab OR exp "Fractures, Bone"/ OR fractur\*.ti,ab) AND (exp "Registries"/ OR "Registries".ti,ab OR "Registry".ti,ab OR "register".ti,ab OR "registers".ti,ab) NOT ("Case Reports"/ OR "case report".ti OR "Review"/ OR "review".ti OR "editorial"/ OR "comment"/ OR "editorial".ti OR "comment".ti)) **OR** ((exp \*"Hip Prosthesis"/ OR exp \*"Arthroplasty, Replacement, Hip"/ OR "Hip prosthesis".ti OR "Hip prostheses".ti OR "Hip Replacement".ti OR "Hip Replacements".ti OR "Hip Arthroplasty".ti OR "Hip Arthroplasties".ti OR "Hip joint prosthesis".ti OR "Hip joint prostheses".ti OR "Hip joint Replacement".ti OR "Hip joint Replacements".ti OR "Hip joint Arthroplasty".ti OR "Hip joint Arthroplasties".ti OR "total hip".ti OR "total hips".ti OR "THR".ti OR "THA".ti OR exp \*"Knee Prosthesis"/ OR exp \*"Arthroplasty, Replacement, Knee"/ OR "Knee prosthesis".ti OR "Knee prostheses".ti OR "Knee Replacement".ti OR "Knee Replacements".ti OR "Knee Arthroplasty".ti OR "Knee Arthroplasties".ti OR "Knee joint prosthesis".ti OR "Knee joint prostheses".ti OR "Knee joint Replacement".ti OR "Knee joint Replacements".ti OR "Knee joint Arthroplasty".ti OR "Knee joint Arthroplasties".ti OR "total Knee".ti OR "total Knees".ti OR "TKR".ti OR "TKA".ti OR (("knee".ti OR "knees".ti OR "hip".ti OR "hips".ti) AND ("prosthesis".ti OR "prostheses".ti OR "Replacement".ti OR "Replacements".ti OR "Arthroplasty".ti OR "Arthroplasties".ti))) AND (exp "Patient Reported Outcome Measures"/ OR "Patient Reported Outcome Measures".ti,ab OR "Patient Reported Outcome Measure".ti,ab OR "PROM".ti,ab OR "PROMS".ti,ab OR exp "Mortality"/ OR "mortality".fs OR exp "Survival Analysis"/ OR exp "Survival Rate"/ OR exp "Disease-Free Survival"/ OR exp "Progression-Free Survival"/ OR exp "Kaplan-Meier Estimate"/ OR exp "Prosthesis Failure"/ OR "mortality".ti,ab OR "Survival".ti,ab OR "Kaplan-Meier".ti,ab OR "Failure".ti,ab OR exp "Postoperative Complications"/ OR exp "Intraoperative Complications"/ OR postoperativ\*.ti,ab OR intraoperativ\*.ti,ab OR "complication".ti,ab OR "complications".ti,ab OR exp "Joint Dislocations"/ OR dislocat\*.ti,ab OR exp "Fractures, Bone"/ OR fractur\*.ti,ab) AND (exp "Prospective Studies"/ OR Prospectiv\*.ti,ab) NOT ("Case Reports"/ OR "case report".ti OR "Review"/ OR "review".ti OR "editorial"/ OR "comment"/ OR "editorial".ti OR "comment".ti)))

## Embase

<http://ovidsp.ovid.com/ovidweb.cgi?T=JS&PAGE=main&MODE=ovid&D=oomezd>

((exp \*Hip Prosthesis"/ OR exp \*Hip Arthroplasty"/ OR exp \*Hip Replacement"/ OR "Hip prosthesis".ti OR "Hip prostheses".ti OR "Hip Replacement".ti OR "Hip Replacements".ti OR "Hip Arthroplasty".ti OR "Hip Arthroplasties".ti OR "Hip joint prosthesis".ti OR "Hip joint prostheses".ti OR "Hip joint Replacement".ti OR "Hip joint Replacements".ti OR "Hip joint Arthroplasty".ti OR "Hip joint Arthroplasties".ti OR "total hip".ti OR "total hips".ti OR "THR".ti OR "THA".ti OR exp \*Knee Prosthesis"/ OR exp \*Knee Arthroplasty"/ OR exp \*Hip Replacement"/ OR "Knee prosthesis".ti OR "Knee prostheses".ti OR "Knee Replacement".ti OR "Knee Replacements".ti OR "Knee Arthroplasty".ti OR "Knee Arthroplasties".ti OR "Knee joint prosthesis".ti OR "Knee joint prostheses".ti OR "Knee joint Replacement".ti OR "Knee joint Replacements".ti OR "Knee joint Arthroplasty".ti OR "Knee joint Arthroplasties".ti OR "total Knee".ti OR "total Knees".ti OR "TKR".ti OR "TKA".ti OR ("knee".ti OR "knees".ti OR "hip".ti OR "hips".ti) AND ("prosthesis".ti OR "prostheses".ti OR "Replacement".ti OR "Replacements".ti OR "Arthroplasty".ti OR "Arthroplasties".ti)) OR \*Joint Prosthesis"/ OR \*Arthroplasty"/ OR "Joint prosthesis".ti OR "Joint prostheses".ti OR "Joint Replacement".ti OR "Joint Replacements".ti OR "Joint Arthroplasty".ti OR "Joint Arthroplasties".ti) AND (exp \*Patient-Reported Outcome"/ OR "Patient Reported Outcome Measures".ti,ab OR "Patient Reported Outcome Measure".ti,ab OR "PROM".ti,ab OR "PROMS".ti,ab OR exp \*Mortality"/ OR exp \*Survival Analysis"/ OR exp \*Survival Rate"/ OR exp \*Disease Free Survival"/ OR exp \*Survival"/ OR exp \*Progression Free Survival"/ OR exp \*Kaplan Meier method"/ OR exp \*Prosthesis Complication"/ OR "mortality".ti,ab OR "Survival".ti,ab OR "Kaplan-Meier".ti,ab OR "Failure".ti,ab OR exp \*Postoperative Complication"/ OR exp \*Peroperative Complication"/ OR postoperativ\*.ti,ab OR intraoperativ\*.ti,ab OR "complication".ti,ab OR "complications".ti,ab OR exp \*Joint Dislocation"/ OR dislocat\*.ti,ab OR exp \*Fracture"/ OR fractur\*.ti,ab) AND (exp "Register"/ OR "Registries".ti,ab OR "Registry".ti,ab OR "register".ti,ab OR "registers".ti,ab) NOT ("Case Report"/ OR "case report".ti OR exp "Review"/ OR "review".ti OR "editorial"/ OR "editorial".ti OR "comment".ti)) **OR** ((exp \*Hip Prosthesis"/ OR exp \*Hip Arthroplasty"/ OR exp \*Hip Replacement"/ OR "Hip prosthesis".ti OR "Hip prostheses".ti OR "Hip Replacement".ti OR "Hip Replacements".ti OR "Hip Arthroplasty".ti OR "Hip Arthroplasties".ti OR "Hip joint prosthesis".ti OR "Hip joint prostheses".ti OR "Hip joint Replacement".ti OR "Hip joint Replacements".ti OR "Hip joint Arthroplasty".ti OR "Hip joint Arthroplasties".ti OR "total hip".ti OR "total hips".ti OR "THR".ti OR "THA".ti OR exp \*Knee Prosthesis"/ OR exp \*Knee Arthroplasty"/ OR exp \*Hip Replacement"/ OR "Knee prosthesis".ti OR "Knee prostheses".ti OR "Knee Replacement".ti OR "Knee Replacements".ti OR "Knee Arthroplasty".ti OR "Knee Arthroplasties".ti OR "Knee joint prosthesis".ti OR "Knee joint prostheses".ti OR "Knee joint Replacement".ti OR "Knee joint Replacements".ti OR "Knee joint Arthroplasty".ti OR "Knee joint Arthroplasties".ti OR "total Knee".ti OR "total Knees".ti OR "TKR".ti OR "TKA".ti OR ("knee".ti OR "knees".ti OR "hip".ti OR "hips".ti) AND ("prosthesis".ti OR "prostheses".ti OR "Replacement".ti OR "Replacements".ti OR "Arthroplasty".ti OR "Arthroplasties".ti)) AND (exp \*Patient-Reported Outcome"/ OR



"Patient Reported Outcome Measures".ti,ab OR "Patient Reported Outcome Measure".ti,ab OR "PROM".ti,ab OR "PROMS".ti,ab OR exp \*"Mortality"/ OR exp \*"Survival Analysis"/ OR exp \*"Survival Rate"/ OR exp \*"Disease Free Survival"/ OR exp \*"Survival"/ OR exp \*"Progression Free Survival"/ OR exp \*"Kaplan Meier method"/ OR exp \*"Prosthesis Complication"/ OR "mortality".ti,ab OR "Survival".ti,ab OR "Kaplan-Meier".ti,ab OR "Failure".ti,ab OR exp \*"Postoperative Complication"/ OR exp \*"Peroperative Complication"/ OR postoperativ\*.ti,ab OR intraoperativ\*.ti,ab OR "complication".ti,ab OR "complications".ti,ab OR exp \*"Joint Dislocation"/ OR dislocat\*.ti,ab OR exp \*"Fracture"/ OR fractur\*.ti,ab) AND (exp "Prospective Study"/ OR Prospectiv\*.ti,ab) NOT ("Case Report"/ OR "case report".ti OR "Review"/ OR "review".ti OR "editorial"/ OR "editorial".ti OR "comment".ti)) NOT (conference review or conference abstract).pt

## Web of Science

<http://isiknowledge.com/wos>

((ti=("Hip Prosthesis" OR "Hip Arthroplasty" OR "Hip Replacement" OR "Hip prosthesis" OR "Hip prostheses" OR "Hip Replacement" OR "Hip Replacements" OR "Hip Arthroplasty" OR "Hip Arthroplasties" OR "Hip joint prosthesis" OR "Hip joint prostheses" OR "Hip joint Replacement" OR "Hip joint Replacements" OR "Hip joint Arthroplasty" OR "Hip joint Arthroplasties" OR "total hip" OR "total hips" OR "THR" OR "THA" OR "Knee Prosthesis" OR "Knee Arthroplasty" OR "Hip Replacement" OR "Knee prosthesis" OR "Knee prostheses" OR "Knee Replacement" OR "Knee Replacements" OR "Knee Arthroplasty" OR "Knee Arthroplasties" OR "Knee joint prosthesis" OR "Knee joint prostheses" OR "Knee joint Replacement" OR "Knee joint Replacements" OR "Knee joint Arthroplasty" OR "Knee joint Arthroplasties" OR "total Knee" OR "total Knees" OR "TKR" OR "TKA" OR (("knee" OR "knees" OR "hip" OR "hips") AND ("prosthesis" OR "prostheses" OR "Replacement" OR "Replacements" OR "Arthroplasty" OR "Arthroplasties"))) OR \*"Joint Prosthesis" OR \*"Arthroplasty" OR "Joint prosthesis" OR "Joint prostheses" OR "Joint Replacement" OR "Joint Replacements" OR "Joint Arthroplasty" OR "Joint Arthroplasties") AND ts=("Patient-Reported Outcome" OR "Patient Reported Outcome Measures" OR "Patient Reported Outcome Measure" OR "PROM" OR "PROMS" OR "Mortality" OR "Survival Analysis" OR "Survival Rate" OR "Disease Free Survival" OR "Survival" OR "Progression Free Survival" OR "Kaplan Meier method" OR "Prosthesis Complication" OR "mortality" OR "Survival" OR "Kaplan-Meier" OR "Failure" OR "Postoperative Complication" OR "Peroperative Complication" OR postoperativ\* OR intraoperativ\* OR "complication" OR "complications" OR "Joint Dislocation" OR dislocat\* OR "Fracture" OR fractur\*) AND ts=("Register" OR "Registries" OR "Registry" OR "register" OR "registers") NOT ti=("Case Report" OR "case report" OR "Review" OR "review" OR "editorial" OR "editorial" OR "comment")) **OR** (ti=("Hip Prosthesis" OR "Hip Arthroplasty" OR "Hip Replacement" OR "Hip prosthesis" OR "Hip prostheses" OR "Hip Replacement" OR "Hip Replacements" OR "Hip Arthroplasty" OR "Hip Arthroplasties" OR "Hip joint prosthesis" OR "Hip joint prostheses" OR "Hip joint Replacement" OR "Hip joint Replacements" OR "Hip joint Arthroplasty" OR "Hip joint Arthroplasties" OR "total hip"

OR "total hips" OR "THR" OR "THA" OR "Knee Prosthesis" OR "Knee Arthroplasty" OR "Hip Replacement" OR "Knee prosthesis" OR "Knee prostheses" OR "Knee Replacement" OR "Knee Replacements" OR "Knee Arthroplasty" OR "Knee Arthroplasties" OR "Knee joint prosthesis" OR "Knee joint prostheses" OR "Knee joint Replacement" OR "Knee joint Replacements" OR "Knee joint Arthroplasty" OR "Knee joint Arthroplasties" OR "total Knee" OR "total Knees" OR "TKR" OR "TKA" OR (("knee" OR "knees" OR "hip" OR "hips") AND ("prosthesis" OR "prostheses" OR "Replacement" OR "Replacements" OR "Arthroplasty" OR "Arthroplasties")) AND ti=("Patient-Reported Outcome" OR "Patient Reported Outcome Measures" OR "Patient Reported Outcome Measure" OR "PROM" OR "PROMS" OR "Mortality" OR "Survival Analysis" OR "Survival Rate" OR "Disease Free Survival" OR "Survival" OR "Progression Free Survival" OR "Kaplan Meier method" OR "Prosthesis Complication" OR "mortality" OR "Survival" OR "Kaplan-Meier" OR "Failure" OR "Postoperative Complication" OR "Peroperative Complication" OR postoperativ\* OR intraoperativ\* OR "complication" OR "complications" OR "Joint Dislocation" OR dislocat\* OR "Fracture" OR fractur\*) AND ts=("Prospective Study" OR Prospectiv\*) NOT ti=("Case Report" OR "case report" OR "Review" OR "review" OR "editorial" OR "editorial" OR "comment")) NOT dt=(meeting abstract)

NOT ti=("veterinary" OR "rabbit" OR "rabbits" OR "animal" OR "animals" OR "mouse" OR "mice" OR "rodent" OR "rodents" OR "rat" OR "rats" OR "pig" OR "pigs" OR "porcine" OR "horse" OR "horses" OR "equine" OR "cow" OR "cows" OR "bovine" OR "goat" OR "goats" OR "sheep" OR "ovine" OR "canine" OR "dog" OR "dogs" OR "feline" OR "cat" OR "cats"))

## Cochrane

<https://www.cochranelibrary.com/advanced-search/search-manager>

((("Hip Prosthesis" OR "Hip Arthroplasty" OR "Hip Replacement" OR "Hip prosthesis" OR "Hip prostheses" OR "Hip Replacement" OR "Hip Replacements" OR "Hip Arthroplasty" OR "Hip Arthroplasties" OR "Hip joint prosthesis" OR "Hip joint prostheses" OR "Hip joint Replacement" OR "Hip joint Replacements" OR "Hip joint Arthroplasty" OR "Hip joint Arthroplasties" OR "total hip" OR "total hips" OR "THR" OR "THA" OR "Knee Prosthesis" OR "Knee Arthroplasty" OR "Hip Replacement" OR "Knee prosthesis" OR "Knee prostheses" OR "Knee Replacement" OR "Knee Replacements" OR "Knee Arthroplasty" OR "Knee Arthroplasties" OR "Knee joint prosthesis" OR "Knee joint prostheses" OR "Knee joint Replacement" OR "Knee joint Replacements" OR "Knee joint Arthroplasty" OR "Knee joint Arthroplasties" OR "total Knee" OR "total Knees" OR "TKR" OR "TKA" OR (("knee" OR "knees" OR "hip" OR "hips") AND ("prosthesis" OR "prostheses" OR "Replacement" OR "Replacements" OR "Arthroplasty" OR "Arthroplasties"))) OR \*"Joint Prosthesis" OR \*"Arthroplasty" OR "Joint prosthesis" OR "Joint prostheses" OR "Joint Replacement" OR "Joint Replacements" OR "Joint Arthroplasty" OR "Joint Arthroplasties"):ti AND ("Patient-Reported Outcome" OR "Patient Reported Outcome Measures" OR "Patient Reported Outcome Measure" OR "PROM" OR "PROMS" OR "Mortality" OR "Survival Analysis" OR "Survival Rate" OR "Disease Free Survival" OR "Survival" OR "Progression Free Survival" OR "Kaplan Meier method" OR "Prosthesis Complication" OR "mortality" OR "Survival" OR "Kaplan-Meier" OR "Failure" OR "Postoperative Complication" OR

"Peroperative Complication" OR postoperativ\* OR intraoperativ\* OR "complication" OR "complications" OR "Joint Dislocation" OR dislocat\* OR "Fracture" OR fractur\*):ti,ab,kw AND ("Register" OR "Registries" OR "Registry" OR "register" OR "registers"):ti,ab,kw) **OR** (("Hip Prosthesis" OR "Hip Arthroplasty" OR "Hip Replacement" OR "Hip prosthesis" OR "Hip prostheses" OR "Hip Replacement" OR "Hip Replacements" OR "Hip Arthroplasty" OR "Hip Arthroplasties" OR "Hip joint prosthesis" OR "Hip joint prostheses" OR "Hip joint Replacement" OR "Hip joint Replacements" OR "Hip joint Arthroplasty" OR "Hip joint Arthroplasties" OR "total hip" OR "total hips" OR "THR" OR "THA" OR "Knee Prosthesis" OR "Knee Arthroplasty" OR "Hip Replacement" OR "Knee prosthesis" OR "Knee prostheses" OR "Knee Replacement" OR "Knee Replacements" OR "Knee Arthroplasty" OR "Knee Arthroplasties" OR "Knee joint prosthesis" OR "Knee joint prostheses" OR "Knee joint Replacement" OR "Knee joint Replacements" OR "Knee joint Arthroplasty" OR "Knee joint Arthroplasties" OR "total Knee" OR "total Knees" OR "TKR" OR "TKA" OR (("knee" OR "knees" OR "hip" OR "hips") AND ("prosthesis" OR "prostheses" OR "Replacement" OR "Replacements" OR "Arthroplasty" OR "Arthroplasties"))):ti AND ("Patient-Reported Outcome" OR "Patient Reported Outcome Measures" OR "Patient Reported Outcome Measure" OR "PROM" OR "PROMS" OR "Mortality" OR "Survival Analysis" OR "Survival Rate" OR "Disease Free Survival" OR "Survival" OR "Progression Free Survival" OR "Kaplan Meier method" OR "Prosthesis Complication" OR "mortality" OR "Survival" OR "Kaplan-Meier" OR "Failure" OR "Postoperative Complication" OR "Peroperative Complication" OR postoperativ\* OR intraoperativ\* OR "complication" OR "complications" OR "Joint Dislocation" OR dislocat\* OR "Fracture" OR fractur\*):ti AND ("Prospective Study" OR Prospectiv\*):ti,ab,kw))

NOT dt=(meeting abstract)

## APPENDIX 2: PROMs and 2-year Revision Rates (Literature review)

**Table 1: THA 2-year Revision Rates**

| Source                                          | Author(s)                | Year                    | Baseline N | Post 2-years N | Revision | 95% CI     | Aseptic | 95%CI    | Septic | 95% CI   |
|-------------------------------------------------|--------------------------|-------------------------|------------|----------------|----------|------------|---------|----------|--------|----------|
| Hospital Based Registry (author correspondence) | Mayo Clinic              | 2000-2019               | 20616      | 20616          | 2.30%    | 2.1-2.5%   |         |          |        |          |
| Hospital Based Registry (annual report)         | MARCQI                   | 2012-2018               | 82835      | 46783          | 1.96%    | 1.86-2.07% |         |          |        |          |
| Literature                                      | Amanatullah et al., 2011 | 1999-2001               | 357        | 313            | 2.20%    | 0.7-3.8%   | 1.68%   | 0.3-3.0% | 0.56%  | 0-1.3%   |
| Literature                                      | Kindsfater et al., 2017  | 2000-2007               | 896        |                | 1.10%    | 0.6-2.2%   |         |          |        |          |
| Literature<br><i>65+ only</i>                   | Sodhi et al., 2018       | Unclear, published 2018 | 255        | 251            | 2%       | 0-3.1%     | 0%      |          | 1.20%  | 0.0-2.5% |
| Hospital Based Registry (annual report)         | AJRR                     | 2012-2018               | 486772     |                |          |            |         |          |        |          |

*Abbreviations: MARCQI, Michigan Arthroplasty Registry Collaborative Quality Initiative; AJRR, American Joint Replacement Registry*

**Table 2: THA 2-year PROMs**

| Source                     | Author(s)          | Year      | Baseline N | Baseline Mean | Baseline SD | Post 2-years N | Post Mean | Post SD | Change Mean | Change SD |
|----------------------------|--------------------|-----------|------------|---------------|-------------|----------------|-----------|---------|-------------|-----------|
| <b>THA HOOS - Pain</b>     |                    |           |            |               |             |                |           |         |             |           |
| Literature                 | Lyman et al., 2018 | 2007-2012 | 2323       | 49            | 17          | 2323           | 93        | 12      | 44          | 19        |
| <b>THA HOOS - Symptoms</b> |                    |           |            |               |             |                |           |         |             |           |
| Literature                 | Lyman et al., 2018 | 2007-2012 | 2323       | 54            | 18          | 2323           | 92        | 12      | 38          | 20        |
| <b>THA HOOS - ADL</b>      |                    |           |            |               |             |                |           |         |             |           |
| Literature                 | Lyman et al., 2018 | 2007-2012 | 2323       | 50            | 18          | 2323           | 90        | 14      | 39          | 20        |

|                           |                         |                |      |       |       |      |        |       |        |       |
|---------------------------|-------------------------|----------------|------|-------|-------|------|--------|-------|--------|-------|
| <b>THA HOOS - QoL</b>     |                         |                |      |       |       |      |        |       |        |       |
| Literature                | Lyman et al., 2018      | 2007-2012      | 2323 | 27    | 18    | 2323 | 83     | 20    | 56     | 25    |
| <b>THA HHS - Overall</b>  |                         |                |      |       |       |      |        |       |        |       |
| Literature                | Restrepo et al., 2010   | 2005-2007      | 100  | 53.4  |       | 100  | 97.445 |       | 44.035 |       |
| Literature                | Sodhi et al., 2018      | published 2018 | 250  |       |       | 250  | 91     |       |        |       |
| Literature                | Kindsfater et al., 2017 | 2000-2007      | 854  | 45.3  | 12.75 | 493  | 94.7   | 8.63  | 48.05  | 13.7  |
| <b>THA EQ-5D</b>          |                         |                |      |       |       |      |        |       |        |       |
| Literature                | Konopka et al., 2018    | 2007-2011      | 5353 | 0.63  | 0.19  | 3514 | 0.88   | 0.14  | 0.25   | 0.2   |
| Literature                | McLawhorn et al., 2017  | 2007-2009      | 2733 | 0.64  | 0.209 | 2733 | 0.89   | 0.157 | 0.24   | 0.209 |
| <b>THA EQ-VAS</b>         |                         |                |      |       |       |      |        |       |        |       |
| Literature                | McLawhorn et al., 2017  | 2007-2009      | 2733 | 74.84 | 17.25 | 2733 | 82.73  | 14.12 | 7.83   | 17.2  |
| <b>THA SF-36</b>          |                         |                |      |       |       |      |        |       |        |       |
| <b>Physical</b>           |                         |                |      |       |       |      |        |       |        |       |
| Literature                | Restrepo et al., 2010   | 2005-2007      | 100  | 38.33 |       | 100  | 49.37  |       | 11.05  |       |
| Literature                | Kindsfater et al., 2017 | 2000-2007      | 809  | 27.3  | 7.27  | 486  | 44.7   | 10.72 | 16.52  | 11.5  |
| <b>THA SF-36 Mental</b>   |                         |                |      |       |       |      |        |       |        |       |
| Literature                | Restrepo et al., 2010   | 2005-2007      | 100  | 50.73 |       | 100  | 56.52  |       | 5.79   |       |
| Literature                | Kindsfater et al., 2012 | 2000-2007      | 809  | 50.6  | 11.4  | 486  | 55.2   | 8.13  | 3.83   | 10.86 |
| <b>THA SF-12 Physical</b> |                         |                |      |       |       |      |        |       |        |       |
| Literature                | Choi et al., 2012       | 2006-2008      | 194  | 27.8  | 7.8   | 194  | 44.9   | 0.82  | 16.3   | 0.91  |
| Literature                | Sodhi et al., 2018      | published 2018 | 250  |       |       | 250  | 48     |       |        |       |
| <b>THA SF-12 Mental</b>   |                         |                |      |       |       |      |        |       |        |       |
| Literature                | Choi et al., 2012       | 2006-2008      | 194  | 49.4  | 11.5  | 194  | 54.2   | 0.67  | 4.7    | 0.86  |

**Table 3: TKA 2-year Revision Rates**

| Source                                               | Author(s)                   | Year              | Baseline N | Post 2-years N | Revision | 95% CI     | Aseptic | 95% CI   | Septic | 95% CI   |
|------------------------------------------------------|-----------------------------|-------------------|------------|----------------|----------|------------|---------|----------|--------|----------|
| Literature                                           | Meding et al., 2013         | 1973-2012         | 16340      | 16058          | 0.6%     | 0.48-0.76% | 0.29    | 0.21-0.4 |        |          |
| Literature                                           | Emerson et al., 2016        | 2004-2013         | 424        |                | 0.9%     |            | 0.30%   | 0-0.9%   | 0.60%  | 0-1.4%   |
| Literature                                           | Emerson et al., 2016        | 2004-2013         | 930        |                | 1.2%     |            | 0.10%   | 0-0.4%   |        |          |
| Literature                                           | Schroer et al., 2014        | 2010-2012         | 957        | 627            | 2.2%     | 1.3-3.5%   |         |          |        |          |
| Literature                                           | Roth et al., 2013           | published in 2013 | 307        | 293            | 1.6%     | 0.2-3.0%   |         |          | 0.30%  | 0-1.0%   |
| Registry                                             | Buller et al., 2019         | 2007-2016         | 10,014     | 9709           | 3.0%     | 2.7-3.4%   | 1.70%   |          | 1.40%  |          |
| Literature                                           | Lozano Caldron et al., 2013 | published in 2013 | 844        |                | 1.7%     | 0.8-2.5%   |         |          |        |          |
| Literature                                           | Charette et al., 2019       | 2013-2017         | 4259       | 4135           | 2.9%     | 2.4-3.4%   | 0.40%   | 0.2-0.6% | 1.10%  | 0.8-1.4% |
| Literature                                           | Kindsfater et al., 2015     | 2005-2007         | 422        | 304            | 1.1%     | 0.4-2.9%   | 0.30%   | 0-0.7%   | 0      |          |
| Literature                                           | Kindsfater et al., 2015     | 2005-2007         | 402        | 297            | 1.1%     | 0.4-3.0%   | 0.30%   | 0-0.9%   | 0.50%  | 0-1.3%   |
| Literature                                           | Pelt et al., 2013           | 2001-2013         | 111        | 110            | 0.9%     |            | 2.72%   | 1.0-7.0  | 1.82   |          |
| Literature                                           | Pelt et al., 2013           | 2001-2013         | 193        | 188            | 2.6%     |            | 3.72%   | 1.0-5.0  | 1.595  |          |
| Hospital-<br>Based<br>Registry                       | Pitta et al., 2018          | 2007-2012         | 18065      | 17648          | 2.2%     | 2.0-2.5%   | 0.48%   |          | 0.57   |          |
| Hospital-<br>Based<br>Registry                       | MARCQI                      | 2012-2018         | 130234     | 81827          | 1.79%    | 1.71-1.87% |         |          |        |          |
| Hospital-<br>Based<br>Registry                       | Mayo Clinic                 | 2000-2019         | 22864      |                | 1.8%     | 1.6-2.0%   |         |          |        |          |
| Hospital-<br>Based<br>Registry<br>(Annual<br>Report) | AJRR                        | 2012-2018         | 591,773    |                | 0.9%     | 0.6-1.0%   |         |          |        |          |

*Abbreviations: MARCQI, Michigan Arthroplasty Registry Collaborative Quality Initiative; AJRR, American Joint Replacement Registry*

**Table 4: TKA 2-year PROMs**

| Source                     | Author(s)                   | Year                       | Baseline N | Baseline Mean | Baseline SD | Post 2-years N | Post Mean | Post SD | Change Mean | Change SD |
|----------------------------|-----------------------------|----------------------------|------------|---------------|-------------|----------------|-----------|---------|-------------|-----------|
| <b>TKA KOOS - Pain</b>     |                             |                            |            |               |             |                |           |         |             |           |
| Literature                 | Lyman et al., 2018          | 2007-2012                  | 3815       | 51            | 17          | 3230           | 88        | 15      | 37          | 20        |
| <b>TKA KOOS - Symptoms</b> |                             |                            |            |               |             |                |           |         |             |           |
| Literature                 | Lyman et al., 2018          | 2007-2012                  | 3815       | 55            | 18          | 3230           | 83        | 15      | 28          | 22        |
| <b>TKA KOOS - ADL</b>      |                             |                            |            |               |             |                |           |         |             |           |
| Literature                 | Lyman et al., 2018          | 2007-2012                  | 3815       | 55            | 17          | 3230           | 85        | 16      | 30          | 19        |
| <b>TKA KOOS - QoL</b>      |                             |                            |            |               |             |                |           |         |             |           |
| Literature                 | Lyman et al., 2018          | 2007-2012                  | 3815       | 28            | 17          | 3230           | 72        | 24      | 44          | 26        |
| <b>TKA KOOS - Sport</b>    |                             |                            |            |               |             |                |           |         |             |           |
| Literature                 | Lyman et al., 2018          | 2007-2012                  | 3815       | 52            |             | 3230           | 80        | 14      | 28          | 17        |
| <b>TKA KSS - Pain</b>      |                             |                            |            |               |             |                |           |         |             |           |
| Literature                 | Lee et al., 2012            | 2000-2004                  |            |               |             | 1193           | 93        |         |             |           |
| Literature                 | Emerson et al., 2016        | 2004-2013                  |            |               |             | 1354           | 92.3      | 12.4    |             |           |
| Literature                 | Schroer et al., 2014        | 2004-2009                  | 627        | 45.9          | 16          | 627            | 92        | 11.5    | 46.1        |           |
| Literature                 | Roth et al., 2013           | Unclear, published in 2013 | 307        | 39.14         | 13.74       | 307            | 92.85     | 8.90    | 53.71       |           |
| Literature                 | Scott et al., 2017          | 2008-2010                  | 113        | 51.01         |             | 111            | 95.16     |         | 44.15       |           |
| Literature                 | Lozano Caldron et al., 2013 | Unclear, published in 2013 | 740        | 10.51         |             |                | 93.48     |         | 36.23       |           |
| Literature                 | Schroer et al., 2016        | 2010-2012                  | 691        | 47            | 15.2        | 691            | 92.4      | 10.9    | 45.4        | 17.1      |
| <b>TKA KSS - Function</b>  |                             |                            |            |               |             |                |           |         |             |           |
| Literature                 | Cherian et al., 2015        | 2005-2007                  | 103        | 57.7          | 18          | 103            | 90.22     | 15.67   |             |           |
| Literature                 | Cherian et al., 2015        | 2005-2007                  | 169        | 50.68         | 16.67       | 169            | 81.21     | 20      |             |           |
| Literature                 | Schroer et al., 2014        | 2004-2009                  | 627        | 45.5          | 18.3        | 627            | 73.8      | 26.3    | 28.3        |           |
| Literature                 | Roth et al., 2013           | Unclear, published in 2013 | 307        | 54.79         | 16.73       | 307            | 86.11     | 17.65   | 28.3        |           |
| Literature                 | Nam et al., 2019            | 2014-2016                  | 147        | 41.10         | 15.24       | 141            | 77.16     | 17.62   | 36.57       | 22.75     |
| Literature                 | Scott et al., 2017          | 2008-2010                  | 113        | 52.72         |             | 111            | 84.57     |         | 31.9        |           |
| Literature                 | Lozano Caldron et al., 2013 | Unclear, published in 2013 | 740        | 54.14         |             |                | 86.61     |         | 32.47       |           |
| Literature                 | Fokin et al., 2014          | 2008-2011                  | 100        | 56.24         | 9.29        | 100            | 97.93     | 6.17    | 41.69       |           |
| Literature                 | Lakra et al., 2019          | 2006-2014                  | 242        | 45            | 21.2        | 242            | 63.3      | 26      | 18.3        |           |

|                           |                              |                   |      |       |       |      |       |       |       |       |
|---------------------------|------------------------------|-------------------|------|-------|-------|------|-------|-------|-------|-------|
| Literature                | Mesko et al., 2013           | 2003-2009         | 81   | 52.2  |       | 81   | 91    |       |       |       |
| Literature                | Schroer et al., 2016         | 2010-2012         | 691  | 44.4  | 18.1  | 691  | 74.5  | 24    | 29    | 23    |
| <b>TKA OKS</b>            |                              |                   |      |       |       |      |       |       |       |       |
| Literature                | Nam et al., 2019             | 2014-2016         | 147  | 22.47 | 7.38  | 141  | 40.35 | 8.25  | 18.59 | 9.54  |
| Literature                | Schroer et al., 2016         | 2010-2012         | 691  | 35.9  | 7.6   | 691  | 18.7  | 6.6   | -17.2 | 8.1   |
| <b>TKA EQ-5D</b>          |                              |                   |      |       |       |      |       |       |       |       |
| Literature                | Steinhaus et al., 2019       | 2007-2009         | 2472 | 0.69  | 0.15  | 2472 | 0.84  | 0.15  | 0.16  | 0.2   |
| Literature                | Konopka et al., 2018         | 2007-2011         | 5282 | 0.68  | 0.17  | 3379 | 0.84  | 0.15  | 0.17  | 0.19  |
| <b>TKA EQ-VAS</b>         |                              |                   |      |       |       |      |       |       |       |       |
| Literature                | Steinhaus et al., 2019       | 2007-2009         | 2472 | 76.18 | 15.91 | 2472 | 80.07 | 14.92 | 3.78  | 16.41 |
| <b>TKA SF-12 Physical</b> |                              |                   |      |       |       |      |       |       |       |       |
| Literature                | Choi et al., 2012            | 2006-2008         | 155  | 29.4  | 7.8   | 155  | 41.9  | 0.92  | 13.4  | 1.02  |
| Literature                | Fokin et al., 2014           | 2008-2011         | 100  | 31.27 | 10.31 | 100  | 45.94 | 11.63 | 14.67 |       |
| Literature                | Lakra et al., 2019           | 2006-2014         | 242  | 30.3  | 8.1   | 242  | 40.4  | 12.1  | 10.1  |       |
| Literature                | Noticewala et al., 2012      | unclear-2009      | 128  | 30.24 | 8.3   | 128  | 40.25 | 11.88 | 10.01 |       |
| <b>TKA SF-12 Mental</b>   |                              |                   |      |       |       |      |       |       |       |       |
| Literature                | Choi et al., 2012            | 2006-2008         | 155  | 49.7  | 11.5  | 155  | 51.6  | 0.76  | 0.93  | 0.98  |
| Literature                | Fokin et al., 2014           | 2008-2011         | 100  | 53.26 | 11.95 | 100  | 52.8  | 11.41 | -0.46 |       |
| Literature                | Lakra et al., 2019           | 2006-2014         | 242  | 50.1  | 11.3  | 242  | 51.8  | 11.8  | 1.7   |       |
| Literature                | Noticewala et al., 2012      | unclear-2009      | 128  | 49.97 | 11.32 | 128  | 50.65 | 10.13 | 0.68  |       |
| <b>TKA SF-36 Physical</b> |                              |                   |      |       |       |      |       |       |       |       |
| Literature                | Lozano Calderon et al., 2012 | published in 2012 | 629  | 32.81 | 7.69  | 629  | 47.42 | 8.85  | 14.61 |       |
| Literature                | Roth et al., 2013            | published in 2013 | 307  | 33.13 | 7.05  | 307  | 47.54 | 8.05  | 14.41 |       |
| Literature                | Scott et al., 2017           | 2008-2010         | 111  | 32.51 |       | 111  | 44.97 |       | 12.46 |       |
| Literature                | Cherian et al., 2015         | 2005-2007         | 103  | 34.26 | 8.02  | 103  | 48.87 | 8.69  |       |       |
| Literature                | Cherian et al., 2015         | 2005-2007         | 169  | 32.08 | 7.52  | 169  | 46.53 | 9.02  |       |       |
| Literature                | Harwin et al., 2013          | 2005-2008         | 281  | 33    |       |      | 46    |       | 13    |       |
| <b>TKA SF-36 Mental</b>   |                              |                   |      |       |       |      |       |       |       |       |
| Literature                | Roth et al., 2013            | published in 2013 | 307  | 53.31 | 10.4  | 307  | 55.8  | 8.05  | 2.49  |       |
| Literature                | Scott et al., 2017           | 2008-2010         | 111  | 51.14 |       | 111  | 53.27 |       | 2.13  |       |
| Literature                | Harwin et al., 2013          | 2005-2008         | 281  | 52    |       |      | 56    |       | 4     |       |
| Literature                | Pitta et al., 2019           | 2007-2012         | 3693 | 52.6  | 11.4  | 3693 | 54.8  | 8.5   | 2.2   |       |
| Literature                | Cherian et al., 2015         | 2005-2007         | 103  | 54.72 | 11.01 | 103  | 57.02 | 6.24  |       |       |
| Literature                | Cherian et al., 2015         | 2005-2007         | 169  | 51.6  | 11.66 | 169  | 54.89 | 8.54  |       |       |



## Appendix 3 – Forest Plots (Meta Analysis)

### 1 Meta Analysis Methods

All meta analyses were done via random-effects models using the maximum likelihood method. For studies with the post SD missing, a pooled SD was imputed using all studies with an available post SD (Furukawa et al., 2006):

$$SD_{Pooled} = \sqrt{\frac{\sum(n_i - 1)SD_i^2}{\sum(n_i - 1)}},$$

where  $n_i$  is the post 2-year sample size for study  $i$ . Revision outcomes were treated as binary and the normal approximation to the binomial distribution was used to calculate the SD:

$$SD = \sqrt{\frac{\text{revision} \times (1 - \text{revision})}{n}}.$$

For studies with the post 2-year sample size  $n_i$  missing, a pooled SD was imputed using the method described above. For THA and TKA revisions, subgroup random-effects models were also fitted stratifying the studies by data source (literature vs. registry/claims).

## 2 THA

### 2.1 THA Overall Revision

Mean: 2.001%; SE = 0.001; 95% CI: (1.799%, 2.202%); 99% CI: (1.736%, 2.266%)

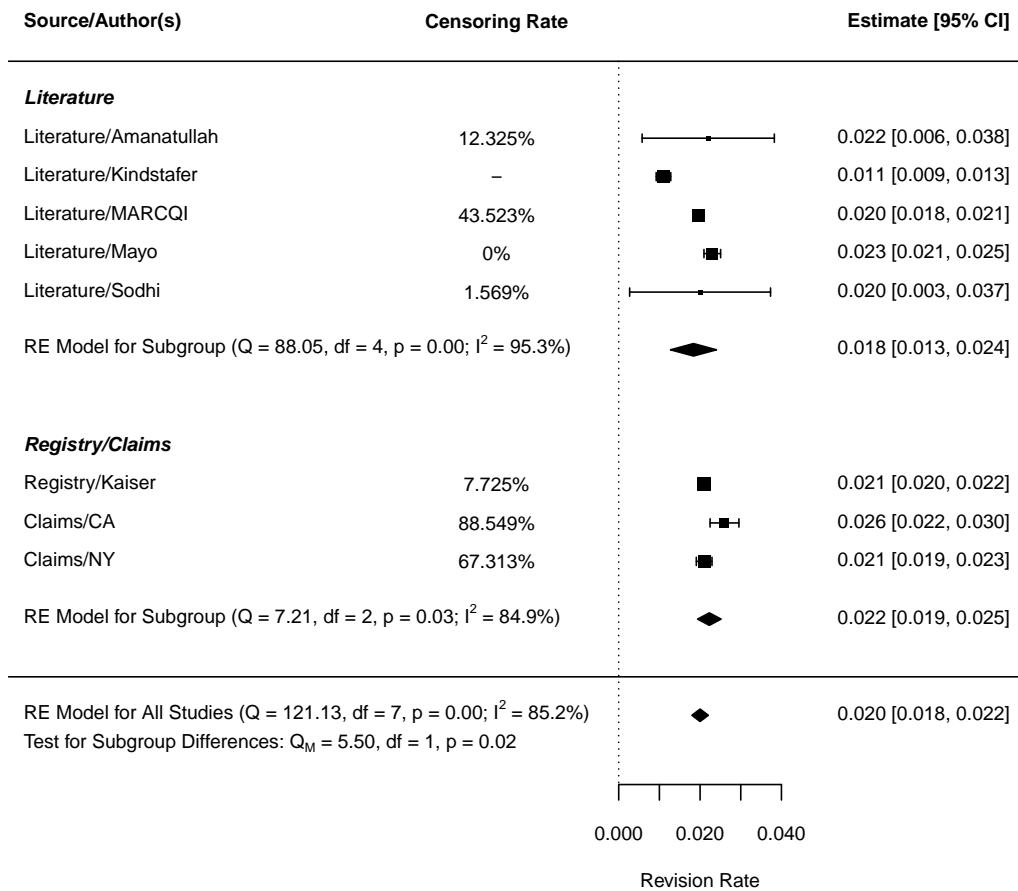

### Leave-One-Out Diagnostics:

|   | estimate | se     | zval    | pval   | ci.lb  | ci.ub  | Q        | Qp     | tau2   | I2      | H2      |
|---|----------|--------|---------|--------|--------|--------|----------|--------|--------|---------|---------|
| 1 | 0.0194   | 0.0011 | 17.1009 | 0.0000 | 0.0172 | 0.0217 | 110.6746 | 0.0000 | 0.0000 | 85.5596 | 6.9250  |
| 2 | 0.0202   | 0.0013 | 15.8383 | 0.0000 | 0.0177 | 0.0227 | 121.0232 | 0.0000 | 0.0000 | 85.5108 | 6.9017  |
| 3 | 0.0201   | 0.0018 | 11.2815 | 0.0000 | 0.0166 | 0.0236 | 121.0615 | 0.0000 | 0.0000 | 95.8013 | 23.8171 |
| 4 | 0.0212   | 0.0005 | 45.7311 | 0.0000 | 0.0203 | 0.0221 | 16.1236  | 0.0131 | 0.0000 | 26.5779 | 1.3620  |
| 5 | 0.0202   | 0.0018 | 11.3139 | 0.0000 | 0.0167 | 0.0237 | 121.1325 | 0.0000 | 0.0000 | 95.8244 | 23.9488 |
| 6 | 0.0198   | 0.0012 | 17.1934 | 0.0000 | 0.0176 | 0.0221 | 119.4242 | 0.0000 | 0.0000 | 85.6709 | 6.9788  |
| 7 | 0.0192   | 0.0011 | 17.3938 | 0.0000 | 0.0170 | 0.0213 | 108.9251 | 0.0000 | 0.0000 | 86.6284 | 7.4785  |
| 8 | 0.0201   | 0.0020 | 9.8591  | 0.0000 | 0.0161 | 0.0241 | 111.3810 | 0.0000 | 0.0000 | 93.9434 | 16.5110 |

## 2.2 THA Septic Revision

Mean: 0.565%; SE = 0.0003; 95% CI: (0.514%, 0.616%); 99% CI: (0.498%, 0.632%)

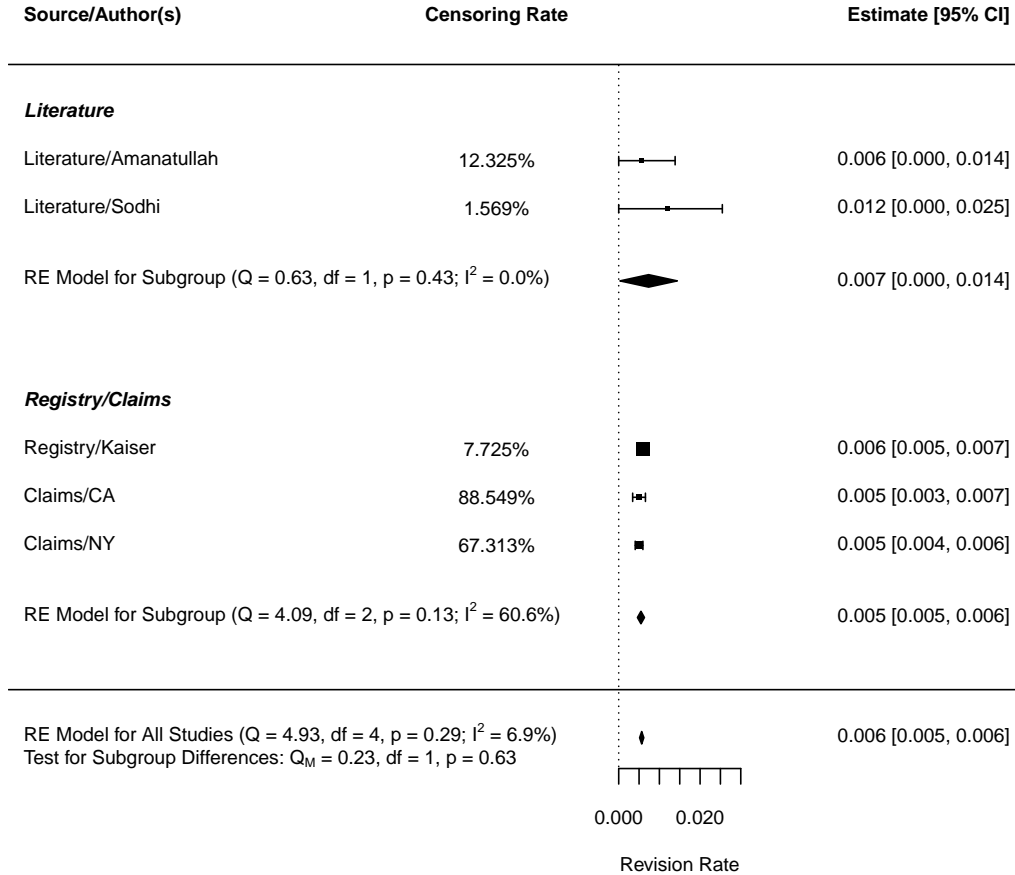

### Leave-One-Out Diagnostics:

|   | estimate | se     | zval    | pval   | ci.lb  | ci.ub  | Q      | Qp     | tau2   | I2     | H2     |
|---|----------|--------|---------|--------|--------|--------|--------|--------|--------|--------|--------|
| 1 | 0.0057   | 0.0003 | 21.6286 | 0.0000 | 0.0051 | 0.0062 | 4.9262 | 0.1773 | 0.0000 | 8.9328 | 1.0981 |
| 2 | 0.0056   | 0.0003 | 21.4125 | 0.0000 | 0.0051 | 0.0062 | 4.0875 | 0.2522 | 0.0000 | 9.6056 | 1.1063 |
| 3 | 0.0059   | 0.0003 | 23.0746 | 0.0000 | 0.0054 | 0.0064 | 2.1913 | 0.5337 | 0.0000 | 0.0000 | 1.0000 |
| 4 | 0.0057   | 0.0003 | 22.6914 | 0.0000 | 0.0053 | 0.0062 | 4.0808 | 0.2529 | 0.0000 | 2.9712 | 1.0306 |
| 5 | 0.0050   | 0.0004 | 12.2339 | 0.0000 | 0.0042 | 0.0058 | 1.0520 | 0.7887 | 0.0000 | 0.0000 | 1.0000 |

## 2.3 THA HOOS - Pain

Mean: 92.147; SE = 9.187; 95% CI: (74.141, 110.153); 99% CI: (68.483, 115.811)

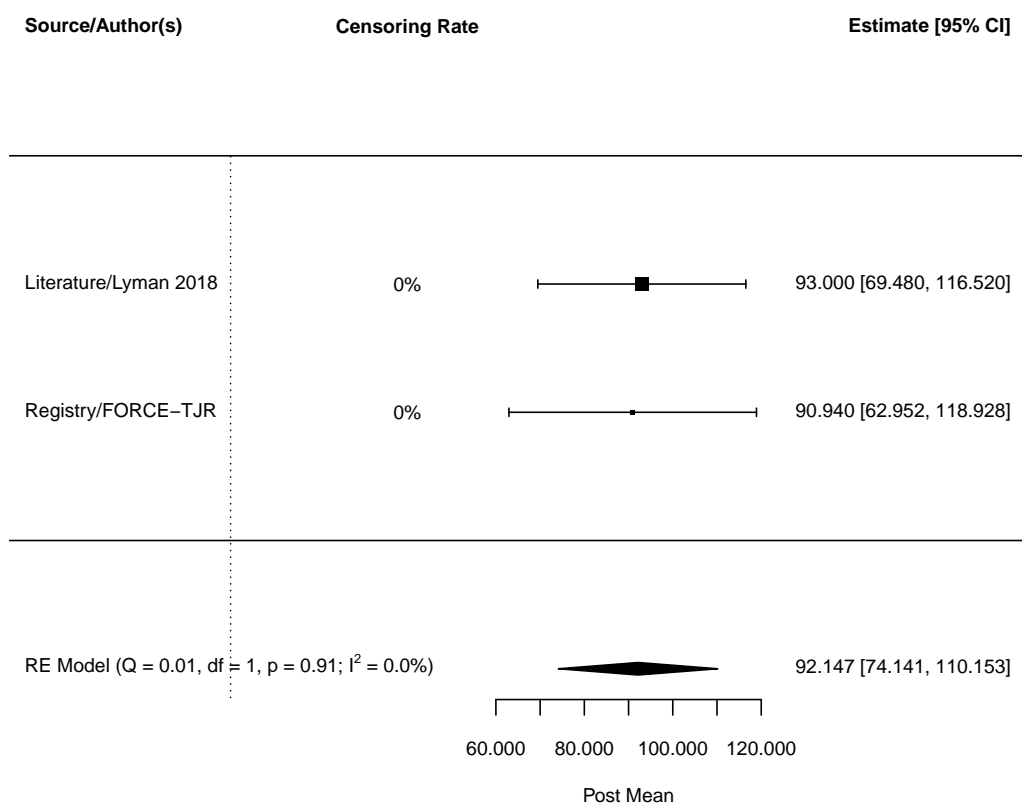

### Leave-One-Out Diagnostics:

|   | estimate | se      | zval   | pval   | ci.lb   | ci.ub    | Q      | Qp     | tau2   | I2     | H2     |
|---|----------|---------|--------|--------|---------|----------|--------|--------|--------|--------|--------|
| 1 | 90.9400  | 14.2800 | 6.3683 | 0.0000 | 62.9517 | 118.9283 | 0.0000 | 1.0000 | 0.0000 | 0.0000 | 1.0000 |
| 2 | 93.0000  | 12.0000 | 7.7500 | 0.0000 | 69.4804 | 116.5196 | 0.0000 | 1.0000 | 0.0000 | 0.0000 | 1.0000 |

## 2.4 THA HOOS - ADL

Mean: 89.491; SE = 10.304; 95% CI: (69.296, 109.686); 99% CI: (62.950, 116.032)

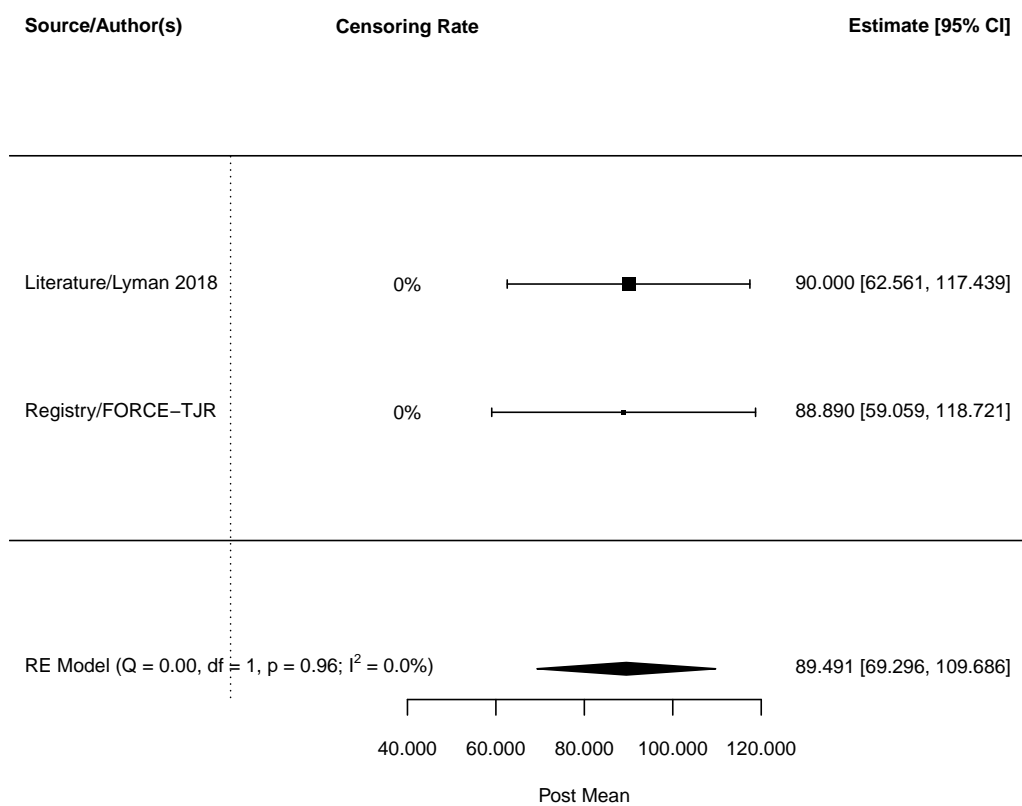

### Leave-One-Out Diagnostics:

|   | estimate | se      | zval   | pval   | ci.lb   | ci.ub    | Q      | Qp     | tau2   | I2     | H2     |
|---|----------|---------|--------|--------|---------|----------|--------|--------|--------|--------|--------|
| 1 | 88.8900  | 15.2200 | 5.8403 | 0.0000 | 59.0593 | 118.7207 | 0.0000 | 1.0000 | 0.0000 | 0.0000 | 1.0000 |
| 2 | 90.0000  | 14.0000 | 6.4286 | 0.0000 | 62.5605 | 117.4395 | 0.0000 | 1.0000 | 0.0000 | 0.0000 | 1.0000 |

## 2.5 THA HOOS - QoL

Mean: 81.706; SE = 14.433; 95% CI: (53.417, 109.995); 99% CI: (44.528, 118.884)

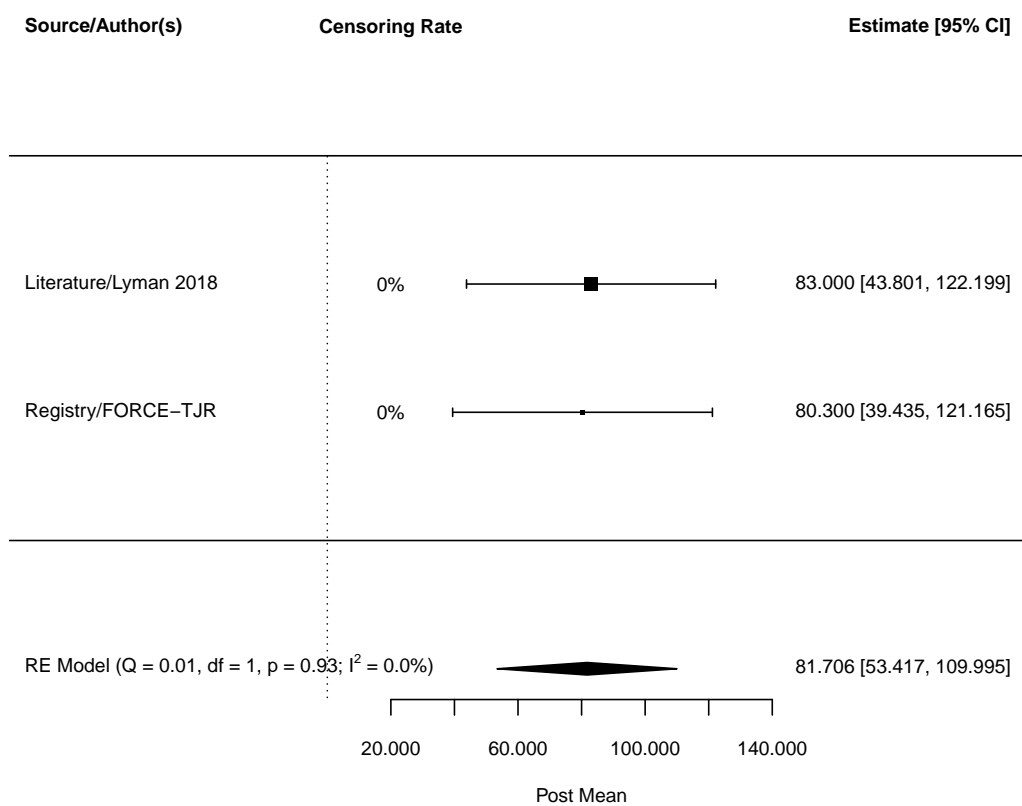

### Leave-One-Out Diagnostics:

|   | estimate | se      | zval   | pval   | ci.lb   | ci.ub    | Q      | Qp     | tau2   | I2     | H2     |
|---|----------|---------|--------|--------|---------|----------|--------|--------|--------|--------|--------|
| 1 | 80.3000  | 20.8500 | 3.8513 | 0.0001 | 39.4348 | 121.1652 | 0.0000 | 1.0000 | 0.0000 | 0.0000 | 1.0000 |
| 2 | 83.0000  | 20.0000 | 4.1500 | 0.0000 | 43.8007 | 122.1993 | 0.0000 | 1.0000 | 0.0000 | 0.0000 | 1.0000 |

## 2.6 THA HHS - Overall

Mean: 94.382; SE = 4.983; 95% CI: (84.616, 104.147); 99% CI: (81.548, 107.216)

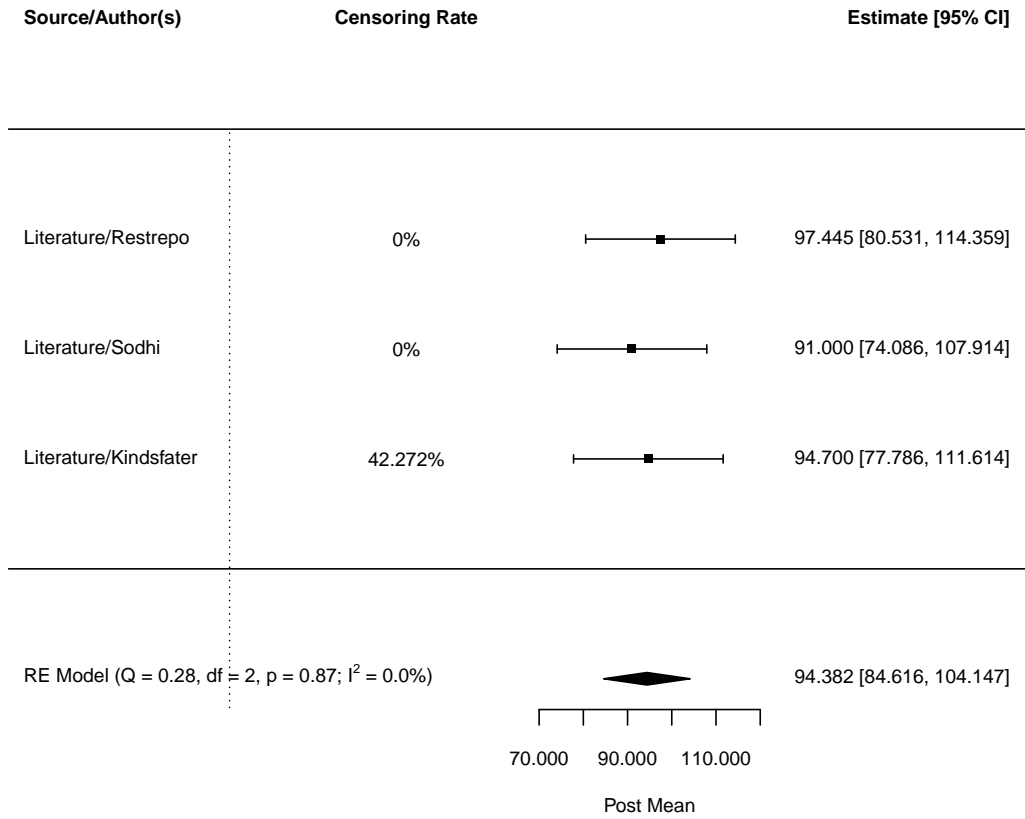

### Leave-One-Out Diagnostics:

|   | estimate | se     | zval    | pval   | ci.lb   | ci.ub    | Q      | Qp     | tau2   | I2     | H2     |
|---|----------|--------|---------|--------|---------|----------|--------|--------|--------|--------|--------|
| 1 | 92.8500  | 6.1023 | 15.2155 | 0.0000 | 80.8896 | 104.8104 | 0.0919 | 0.7618 | 0.0000 | 0.0000 | 1.0000 |
| 2 | 96.0725  | 6.1023 | 15.7436 | 0.0000 | 84.1121 | 108.0329 | 0.0506 | 0.8220 | 0.0000 | 0.0000 | 1.0000 |
| 3 | 94.2225  | 6.1023 | 15.4404 | 0.0000 | 82.2621 | 106.1829 | 0.2789 | 0.5974 | 0.0000 | 0.0000 | 1.0000 |



## 2.7 THA EQ-5D

Mean: 0.884; SE = 0.104; 95% CI: (0.680, 1.089); 99% CI: (0.615, 1.154)

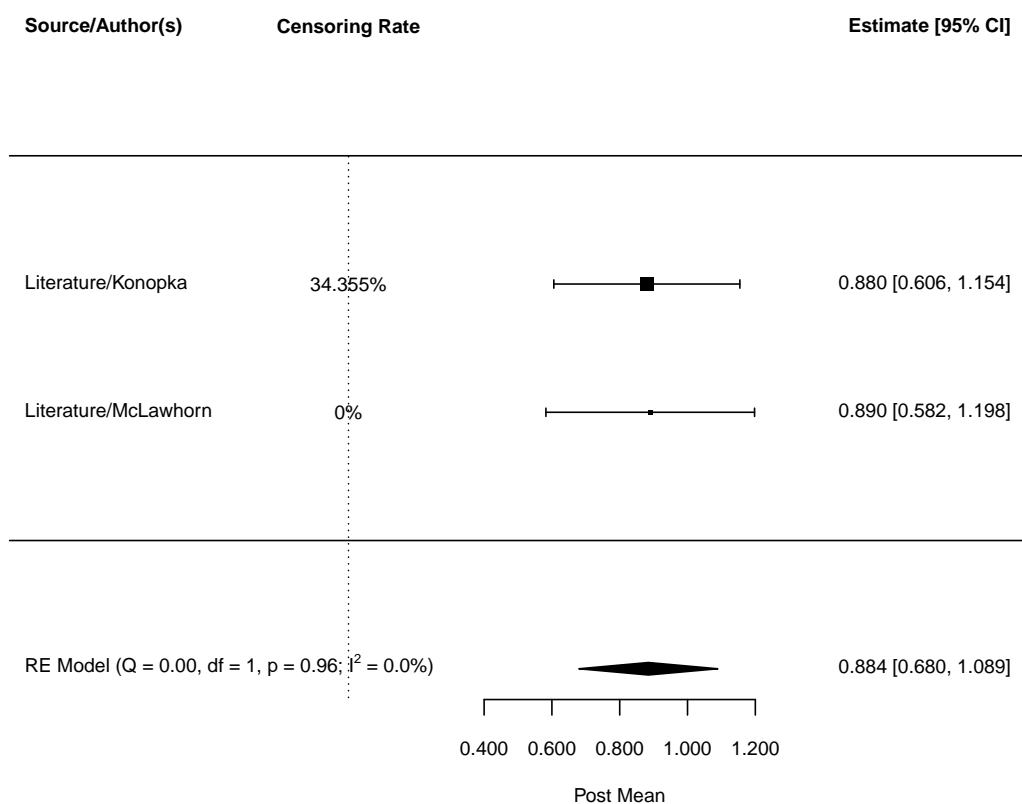

### Leave-One-Out Diagnostics:

|   | estimate | se     | zval   | pval   | ci.lb  | ci.ub  | Q      | Qp     | tau2   | I2     | H2     |
|---|----------|--------|--------|--------|--------|--------|--------|--------|--------|--------|--------|
| 1 | 0.8900   | 0.1570 | 5.6688 | 0.0000 | 0.5823 | 1.1977 | 0.0000 | 1.0000 | 0.0000 | 0.0000 | 1.0000 |
| 2 | 0.8800   | 0.1400 | 6.2857 | 0.0000 | 0.6056 | 1.1544 | 0.0000 | 1.0000 | 0.0000 | 0.0000 | 1.0000 |

## 2.8 THA SF-12 Physical

Mean: 46.450; SE = 1.096; 95% CI: (44.302, 48.598); 99% CI: (43.627, 49.273)

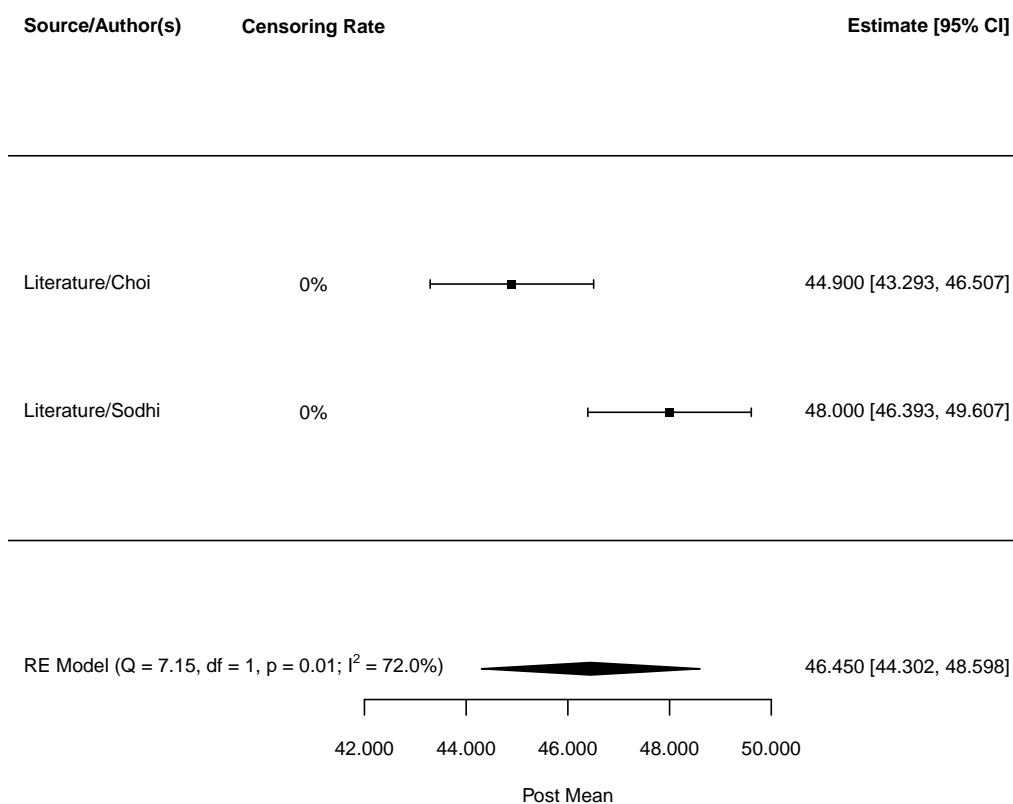

### Leave-One-Out Diagnostics:

|   | estimate | se     | zval    | pval   | ci.lb   | ci.ub   | Q      | Qp     | tau2   | I2     | H2     |
|---|----------|--------|---------|--------|---------|---------|--------|--------|--------|--------|--------|
| 1 | 48.0000  | 0.8200 | 58.5366 | 0.0000 | 46.3928 | 49.6072 | 0.0000 | 1.0000 | 0.0000 | 0.0000 | 1.0000 |
| 2 | 44.9000  | 0.8200 | 54.7561 | 0.0000 | 43.2928 | 46.5072 | 0.0000 | 1.0000 | 0.0000 | 0.0000 | 1.0000 |

## 2.9 THA SF-36 Physical

Mean: 46.900; SE = 5.944; 95% CI: (35.249, 58.550); 99% CI: (31.588, 62.211)

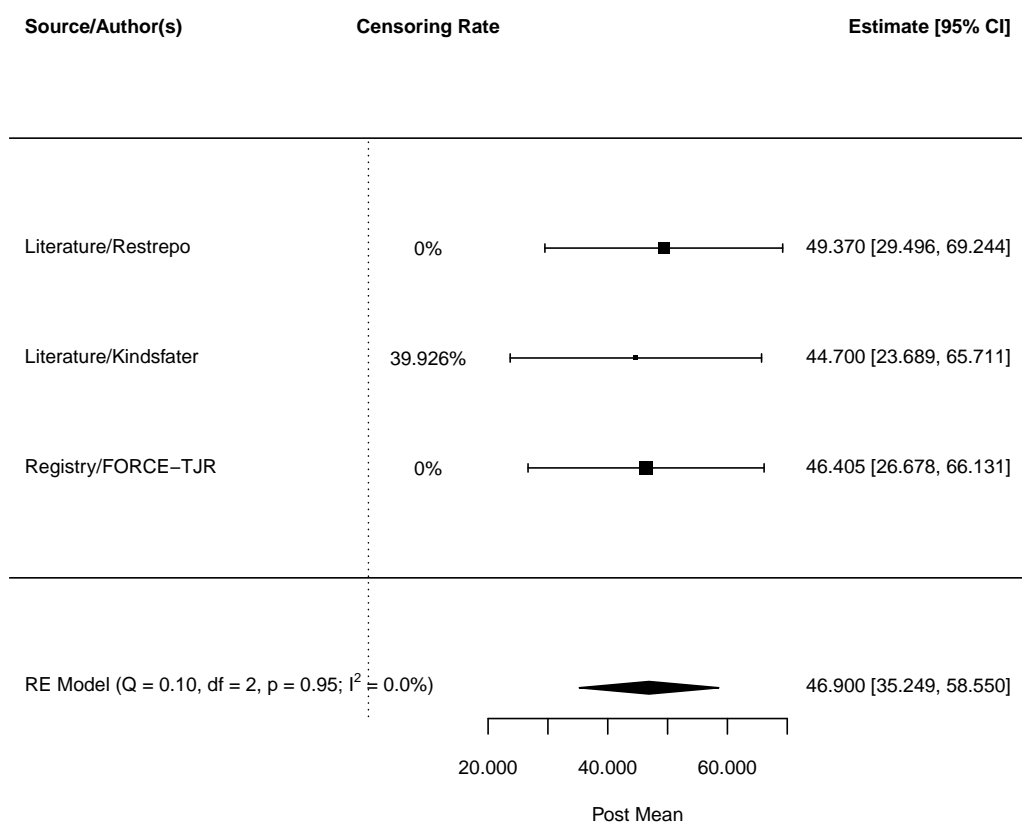

### Leave-One-Out Diagnostics:

|   | estimate | se     | zval   | pval   | ci.lb   | ci.ub   | Q      | Qp     | tau2   | I2     | H2     |
|---|----------|--------|--------|--------|---------|---------|--------|--------|--------|--------|--------|
| 1 | 45.6060  | 7.3376 | 6.2154 | 0.0000 | 31.2246 | 59.9874 | 0.0134 | 0.9077 | 0.0000 | 0.0000 | 1.0000 |
| 2 | 47.8763  | 7.1432 | 6.7023 | 0.0000 | 33.8758 | 61.8768 | 0.0431 | 0.8356 | 0.0000 | 0.0000 | 1.0000 |
| 3 | 47.1648  | 7.3665 | 6.4026 | 0.0000 | 32.7267 | 61.6028 | 0.1002 | 0.7516 | 0.0000 | 0.0000 | 1.0000 |

## 2.10 THA SF-36 Mental

Mean: 55.256; SE = 5.034; 95% CI: (45.389, 65.123); 99% CI: (42.289, 68.223)

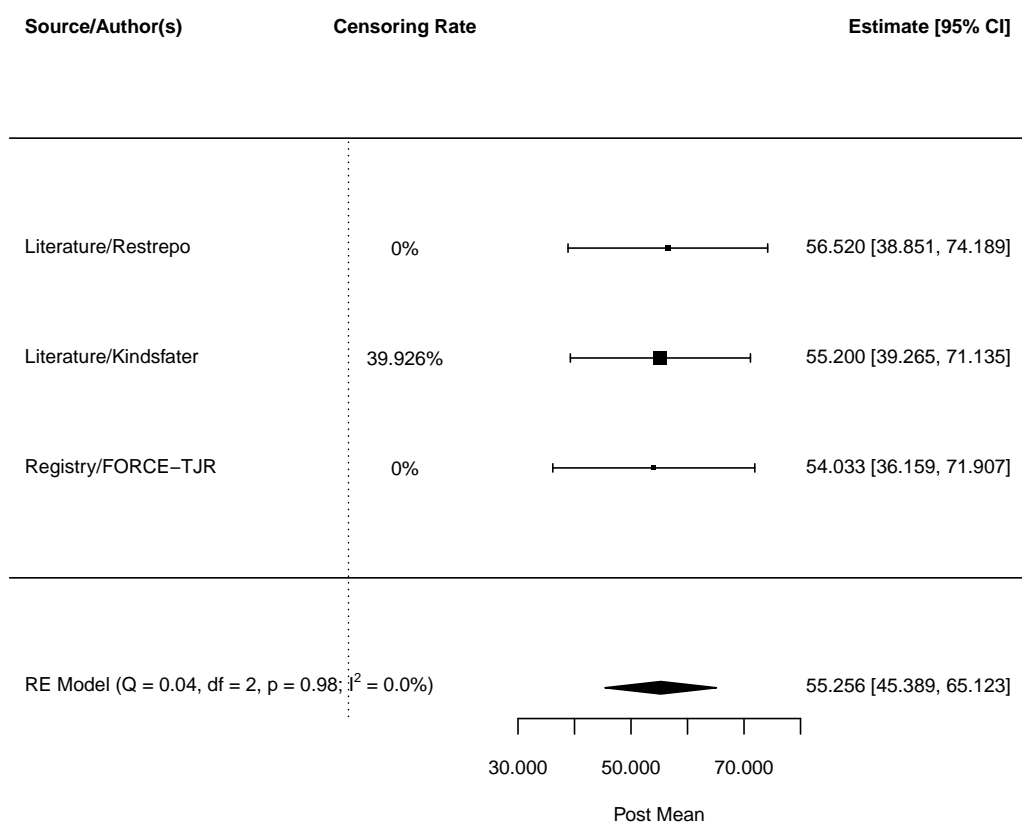

### Leave-One-Out Diagnostics:

|   | estimate | se     | zval   | pval   | ci.lb   | ci.ub   | Q      | Qp     | tau2   | I2     | H2     |
|---|----------|--------|--------|--------|---------|---------|--------|--------|--------|--------|--------|
| 1 | 54.6833  | 6.0686 | 9.0108 | 0.0000 | 42.7890 | 66.5776 | 0.0091 | 0.9239 | 0.0000 | 0.0000 | 1.0000 |
| 2 | 55.2909  | 6.4112 | 8.6241 | 0.0000 | 42.7252 | 67.8567 | 0.0376 | 0.8462 | 0.0000 | 0.0000 | 1.0000 |
| 3 | 55.7921  | 6.0375 | 9.2410 | 0.0000 | 43.9588 | 67.6253 | 0.0118 | 0.9134 | 0.0000 | 0.0000 | 1.0000 |

### 3 TKA

#### 3.1 TKA Overall Revision

Mean: 1.640%; SE = 0.001; 95% CI: (1.350%, 1.931%); 99% CI: (1.258%, 2.022%)

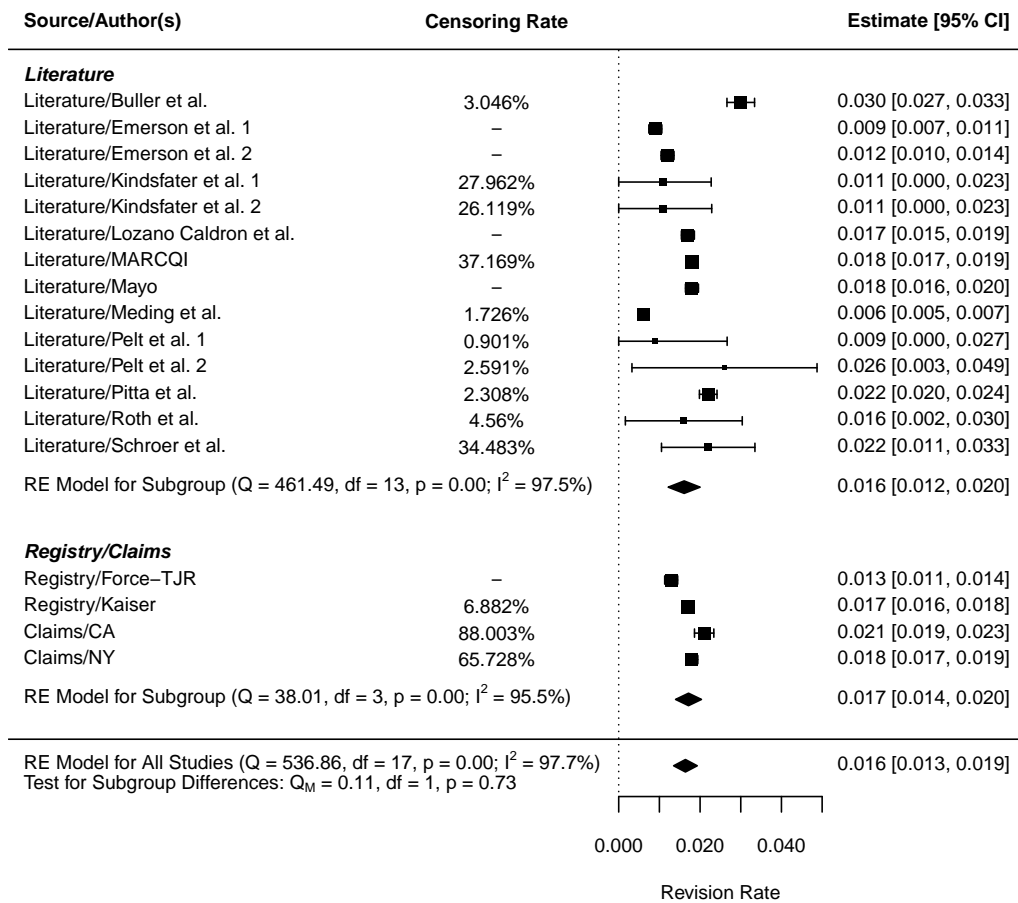

### Leave-One-Out Diagnostics:

|    | estimate | se     | zval    | pval   | ci.lb  | ci.ub  | Q        | Qp     | tau2   | I2      | H2      |
|----|----------|--------|---------|--------|--------|--------|----------|--------|--------|---------|---------|
| 1  | 0.0172   | 0.0014 | 12.5780 | 0.0000 | 0.0145 | 0.0199 | 257.1081 | 0.0000 | 0.0000 | 96.7888 | 31.1411 |
| 2  | 0.0170   | 0.0015 | 11.4119 | 0.0000 | 0.0141 | 0.0199 | 465.1125 | 0.0000 | 0.0000 | 97.4737 | 39.5832 |
| 3  | 0.0167   | 0.0016 | 10.7720 | 0.0000 | 0.0137 | 0.0198 | 514.9844 | 0.0000 | 0.0000 | 97.7088 | 43.6455 |
| 4  | 0.0162   | 0.0015 | 10.6521 | 0.0000 | 0.0132 | 0.0192 | 535.6974 | 0.0000 | 0.0000 | 97.8587 | 46.7012 |
| 5  | 0.0164   | 0.0015 | 10.7339 | 0.0000 | 0.0134 | 0.0194 | 536.8541 | 0.0000 | 0.0000 | 97.9023 | 47.6703 |
| 6  | 0.0154   | 0.0013 | 12.2142 | 0.0000 | 0.0130 | 0.0179 | 467.8047 | 0.0000 | 0.0000 | 96.6073 | 29.4752 |
| 7  | 0.0164   | 0.0016 | 10.3024 | 0.0000 | 0.0132 | 0.0195 | 534.1474 | 0.0000 | 0.0000 | 97.8170 | 45.8077 |
| 8  | 0.0166   | 0.0015 | 10.9061 | 0.0000 | 0.0136 | 0.0196 | 536.2383 | 0.0000 | 0.0000 | 97.8602 | 46.7334 |
| 9  | 0.0166   | 0.0015 | 10.9071 | 0.0000 | 0.0136 | 0.0196 | 536.2525 | 0.0000 | 0.0000 | 97.8602 | 46.7334 |
| 10 | 0.0166   | 0.0015 | 11.0020 | 0.0000 | 0.0136 | 0.0195 | 536.3022 | 0.0000 | 0.0000 | 97.8428 | 46.3563 |
| 11 | 0.0163   | 0.0015 | 10.7794 | 0.0000 | 0.0133 | 0.0192 | 536.0678 | 0.0000 | 0.0000 | 97.8740 | 47.0373 |
| 12 | 0.0160   | 0.0015 | 10.4289 | 0.0000 | 0.0130 | 0.0190 | 503.3180 | 0.0000 | 0.0000 | 97.7203 | 43.8659 |
| 13 | 0.0163   | 0.0016 | 10.2765 | 0.0000 | 0.0132 | 0.0194 | 526.2526 | 0.0000 | 0.0000 | 97.7680 | 44.8025 |
| 14 | 0.0161   | 0.0016 | 10.3601 | 0.0000 | 0.0130 | 0.0191 | 517.2699 | 0.0000 | 0.0000 | 97.7943 | 45.3366 |
| 15 | 0.0164   | 0.0016 | 10.2911 | 0.0000 | 0.0132 | 0.0195 | 511.9520 | 0.0000 | 0.0000 | 97.1052 | 34.5451 |
| 16 | 0.0163   | 0.0016 | 10.2713 | 0.0000 | 0.0132 | 0.0194 | 509.8807 | 0.0000 | 0.0000 | 97.4688 | 39.5062 |
| 17 | 0.0163   | 0.0016 | 10.2791 | 0.0000 | 0.0132 | 0.0194 | 528.3865 | 0.0000 | 0.0000 | 97.8055 | 45.5683 |
| 18 | 0.0167   | 0.0016 | 10.6400 | 0.0000 | 0.0136 | 0.0197 | 524.3337 | 0.0000 | 0.0000 | 97.7504 | 44.4515 |

### 3.2 TKA Septic Revision

Mean: 0.684%; SE = 0.001; 95% CI: (0.489%, 0.879%); 99% CI: (0.427%, 0.940%)

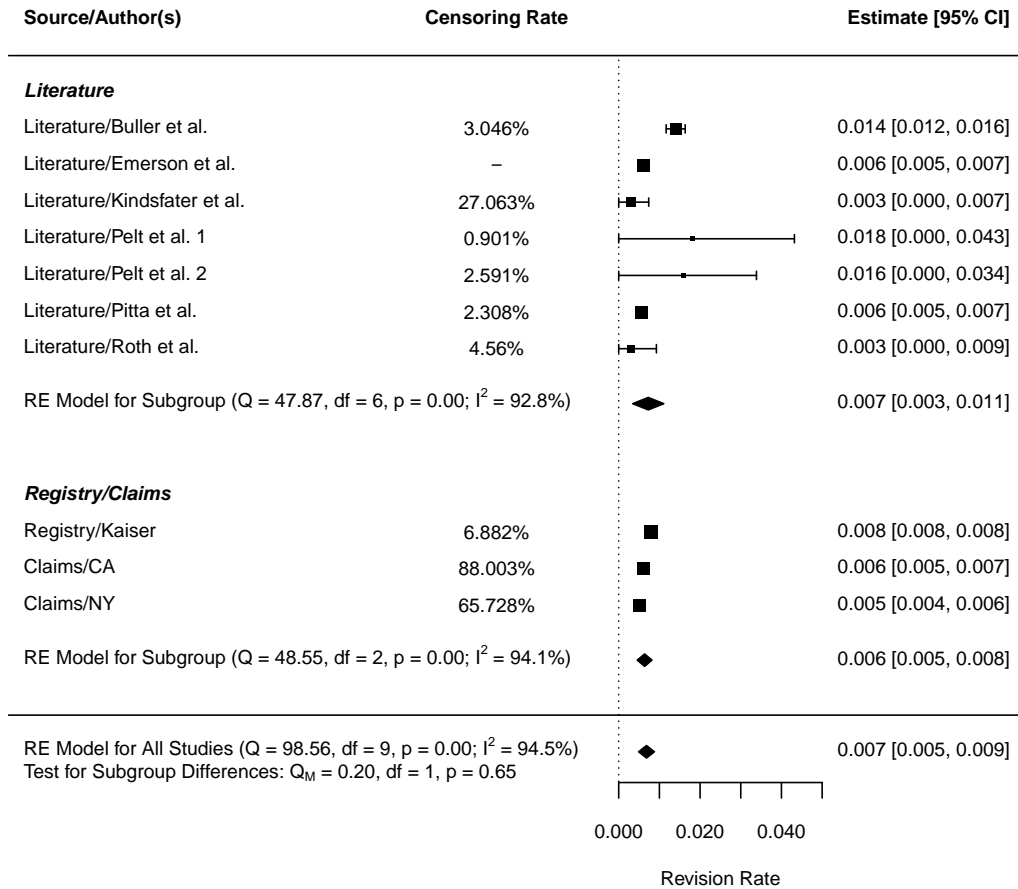

### Leave-One-Out Diagnostics:

|    | estimate | se     | zval    | pval   | ci.lb  | ci.ub  | Q       | Qp     | tau2   | I2      | H2      |
|----|----------|--------|---------|--------|--------|--------|---------|--------|--------|---------|---------|
| 1  | 0.0070   | 0.0012 | 6.0433  | 0.0000 | 0.0047 | 0.0092 | 94.9307 | 0.0000 | 0.0000 | 95.0080 | 20.0322 |
| 2  | 0.0070   | 0.0009 | 7.7848  | 0.0000 | 0.0053 | 0.0088 | 96.9568 | 0.0000 | 0.0000 | 93.5616 | 15.5318 |
| 3  | 0.0060   | 0.0005 | 11.7085 | 0.0000 | 0.0050 | 0.0070 | 63.8521 | 0.0000 | 0.0000 | 76.8333 | 4.3165  |
| 4  | 0.0071   | 0.0008 | 8.4513  | 0.0000 | 0.0055 | 0.0088 | 95.2598 | 0.0000 | 0.0000 | 92.2755 | 12.9458 |
| 5  | 0.0068   | 0.0011 | 6.2708  | 0.0000 | 0.0046 | 0.0089 | 97.7958 | 0.0000 | 0.0000 | 95.8601 | 24.1549 |
| 6  | 0.0067   | 0.0011 | 6.4021  | 0.0000 | 0.0047 | 0.0088 | 97.6117 | 0.0000 | 0.0000 | 95.5913 | 22.6822 |
| 7  | 0.0070   | 0.0011 | 6.1710  | 0.0000 | 0.0048 | 0.0093 | 92.4244 | 0.0000 | 0.0000 | 94.8336 | 19.3558 |
| 8  | 0.0071   | 0.0011 | 6.6031  | 0.0000 | 0.0050 | 0.0093 | 64.6796 | 0.0000 | 0.0000 | 92.7652 | 13.8221 |
| 9  | 0.0070   | 0.0012 | 6.0600  | 0.0000 | 0.0047 | 0.0092 | 95.8374 | 0.0000 | 0.0000 | 95.1974 | 20.8221 |
| 10 | 0.0066   | 0.0012 | 5.6514  | 0.0000 | 0.0043 | 0.0090 | 56.2957 | 0.0000 | 0.0000 | 92.4034 | 13.1638 |



### 3.3 TKA KOOS - Pain

Mean: 87.452; SE = 11.053; 95% CI: (65.788, 109.115); 99% CI: (58.981, 115.922)

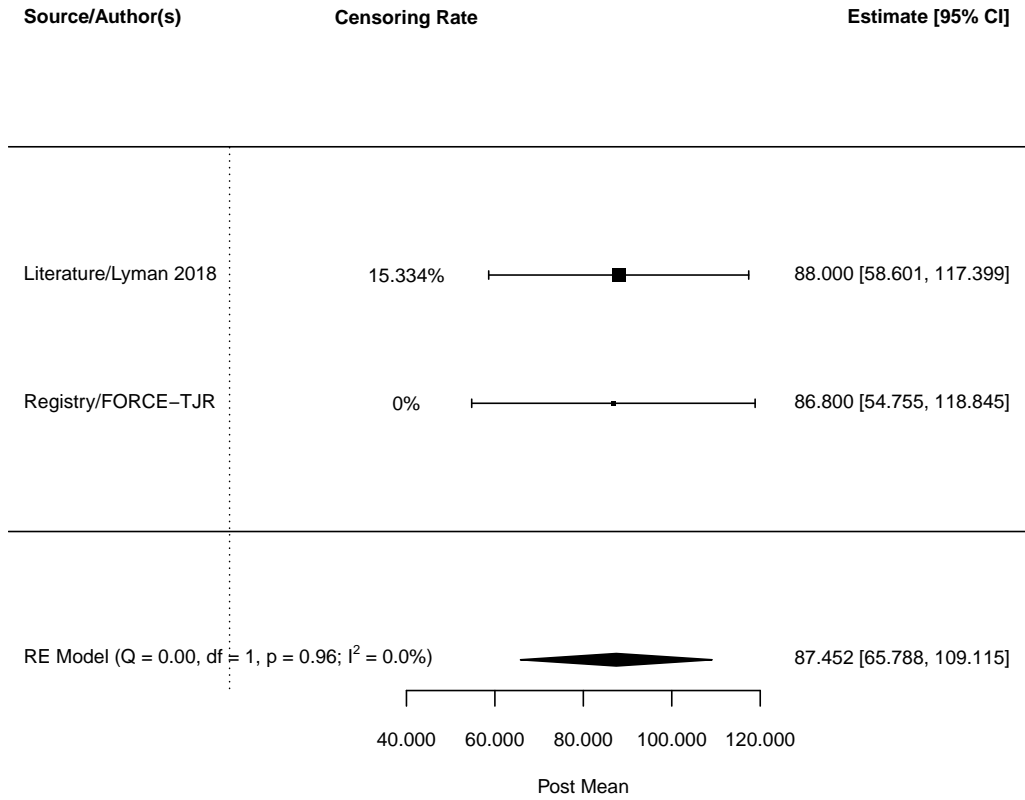

#### Leave-One-Out Diagnostics:

|   | estimate | se      | zval   | pval   | ci.lb   | ci.ub    | Q      | Qp     | tau2   | I2     | H2     |
|---|----------|---------|--------|--------|---------|----------|--------|--------|--------|--------|--------|
| 1 | 86.8000  | 16.3500 | 5.3089 | 0.0000 | 54.7546 | 118.8454 | 0.0000 | 1.0000 | 0.0000 | 0.0000 | 1.0000 |
| 2 | 88.0000  | 15.0000 | 5.8667 | 0.0000 | 58.6005 | 117.3995 | 0.0000 | 1.0000 | 0.0000 | 0.0000 | 1.0000 |

### 3.4 TKA KOOS - ADL

Mean: 85.512; SE = 11.401; 95% CI: (63.166, 107.858); 99% CI: (56.145, 114.879)

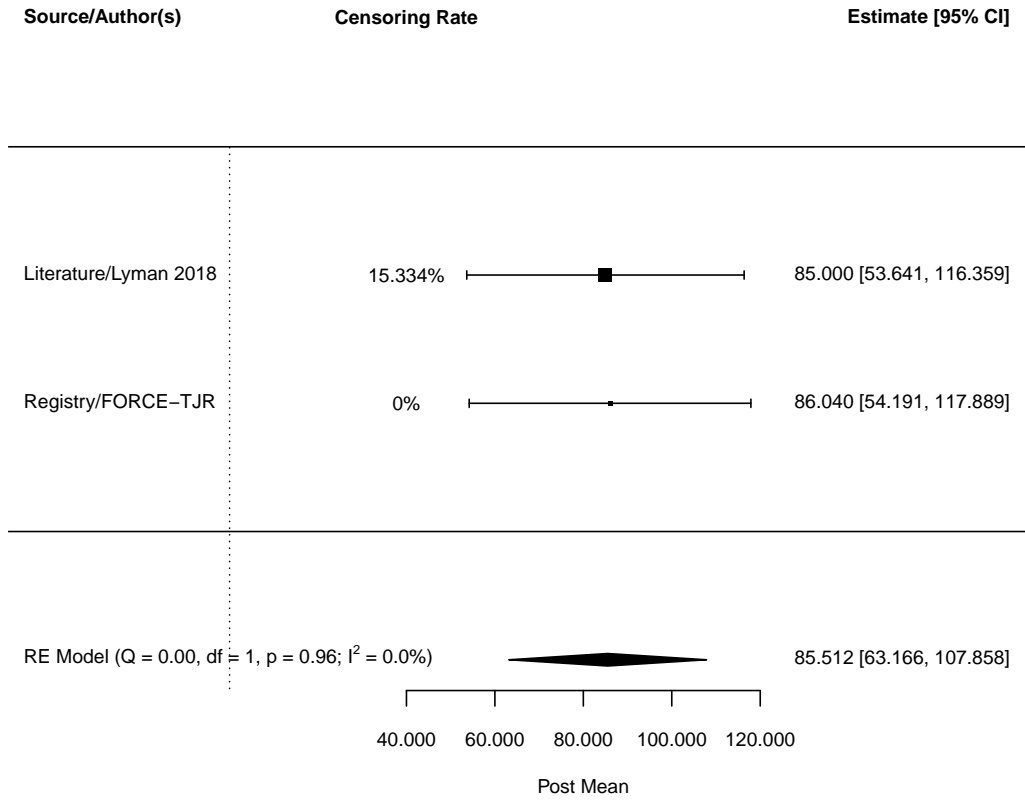

#### Leave-One-Out Diagnostics:

|   | estimate | se      | zval   | pval   | ci.lb   | ci.ub    | Q      | Qp     | tau2   | I2     | H2     |
|---|----------|---------|--------|--------|---------|----------|--------|--------|--------|--------|--------|
| 1 | 86.0400  | 16.2500 | 5.2948 | 0.0000 | 54.1906 | 117.8894 | 0.0000 | 1.0000 | 0.0000 | 0.0000 | 1.0000 |
| 2 | 85.0000  | 16.0000 | 5.3125 | 0.0000 | 53.6406 | 116.3594 | 0.0000 | 1.0000 | 0.0000 | 0.0000 | 1.0000 |

### 3.5 TKA KOOS - QoL

Mean: 71.949; SE = 16.816; 95% CI: (38.989, 104.909); 99% CI: (28.633, 115.265)

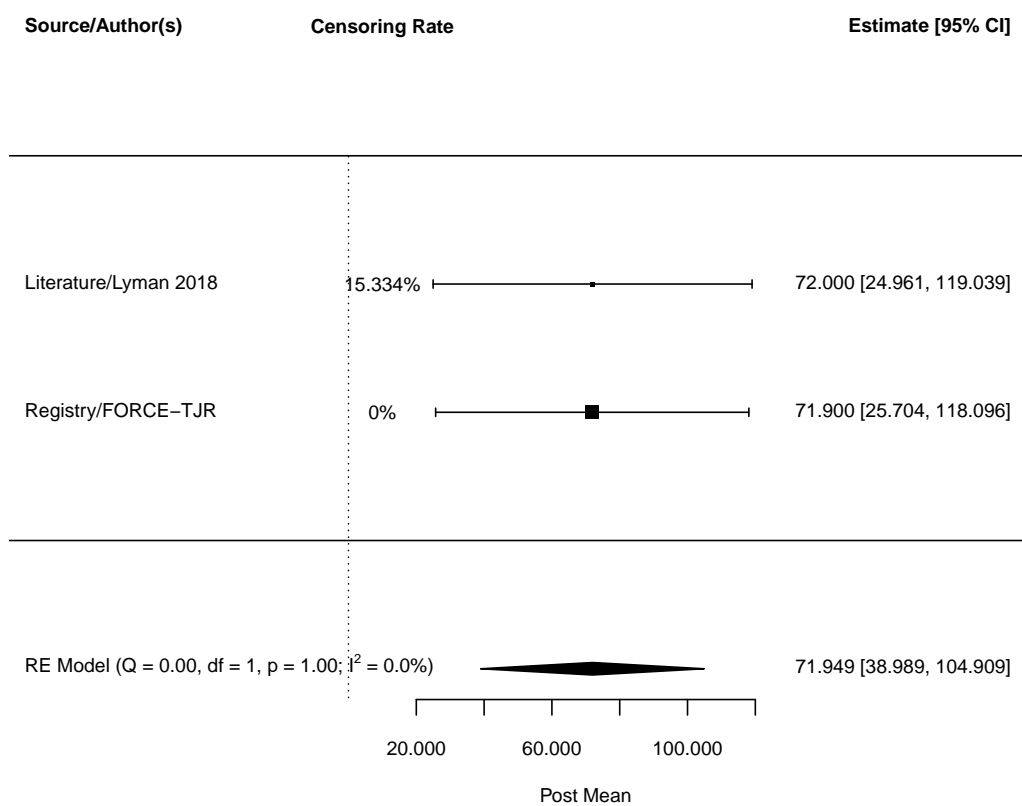

#### Leave-One-Out Diagnostics:

|   | estimate | se      | zval   | pval   | ci.lb   | ci.ub    | Q      | Qp     | tau2   | I2     | H2     |
|---|----------|---------|--------|--------|---------|----------|--------|--------|--------|--------|--------|
| 1 | 71.9000  | 23.5700 | 3.0505 | 0.0023 | 25.7036 | 118.0964 | 0.0000 | 1.0000 | 0.0000 | 0.0000 | 1.0000 |
| 2 | 72.0000  | 24.0000 | 3.0000 | 0.0027 | 24.9609 | 119.0391 | 0.0000 | 1.0000 | 0.0000 | 0.0000 | 1.0000 |

### 3.6 TKA KSS - Pain

Mean: 93.013; SE = 4.167; 95% CI: (84.845, 101.180); 99% CI: (82.279, 103.747)

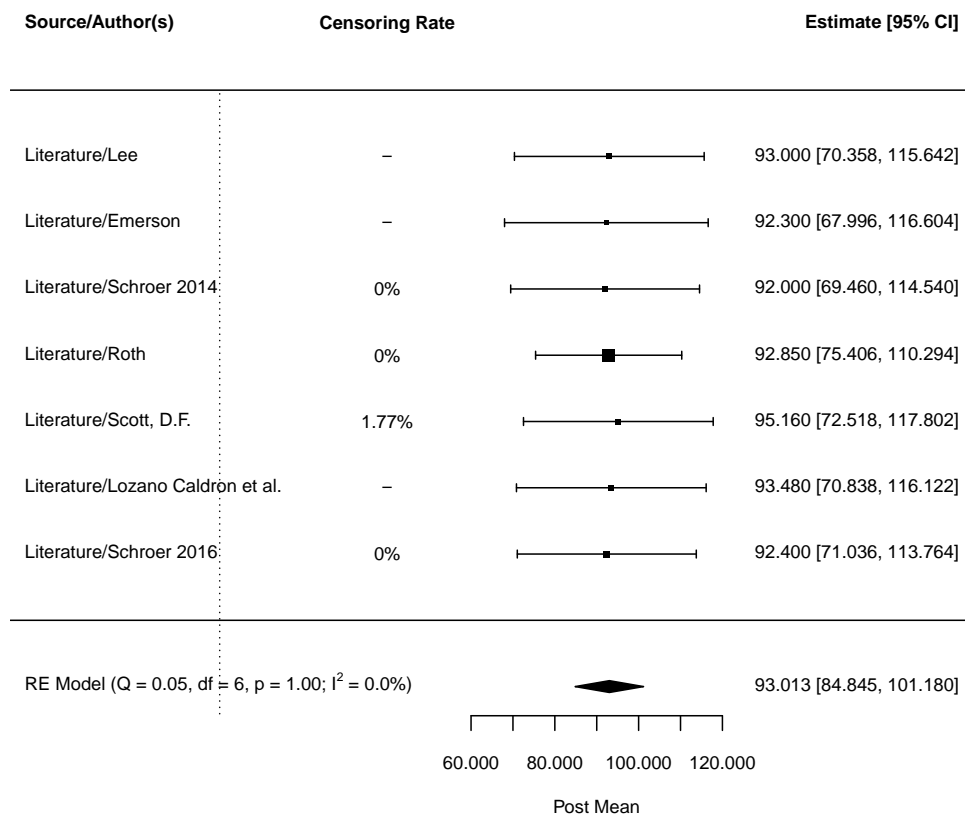

#### Leave-One-Out Diagnostics:

|   | estimate | se     | zval    | pval   | ci.lb   | ci.ub    | Q      | Qp     | tau2   | I2     | H2     |
|---|----------|--------|---------|--------|---------|----------|--------|--------|--------|--------|--------|
| 1 | 93.0144  | 4.4680 | 20.8179 | 0.0000 | 84.2573 | 101.7716 | 0.0507 | 1.0000 | 0.0000 | 0.0000 | 1.0000 |
| 2 | 93.1033  | 4.4245 | 21.0425 | 0.0000 | 84.4314 | 101.7752 | 0.0470 | 1.0000 | 0.0000 | 0.0000 | 1.0000 |
| 3 | 93.1656  | 4.4711 | 20.8374 | 0.0000 | 84.4025 | 101.9288 | 0.0418 | 1.0000 | 0.0000 | 0.0000 | 1.0000 |
| 4 | 93.0582  | 4.7161 | 19.7320 | 0.0000 | 83.8148 | 102.3016 | 0.0503 | 1.0000 | 0.0000 | 0.0000 | 1.0000 |
| 5 | 92.6913  | 4.4680 | 20.7455 | 0.0000 | 83.9342 | 101.4485 | 0.0110 | 1.0000 | 0.0000 | 0.0000 | 1.0000 |
| 6 | 92.9426  | 4.4680 | 20.8018 | 0.0000 | 84.1855 | 101.6998 | 0.0489 | 1.0000 | 0.0000 | 0.0000 | 1.0000 |
| 7 | 93.1174  | 4.5098 | 20.6478 | 0.0000 | 84.2784 | 101.9565 | 0.0470 | 1.0000 | 0.0000 | 0.0000 | 1.0000 |

### 3.7 TKA KSS - Function

Mean: 90.555; SE = 4.574; 95% CI: (81.590, 99.520); 99% CI: (78.773, 102.337)

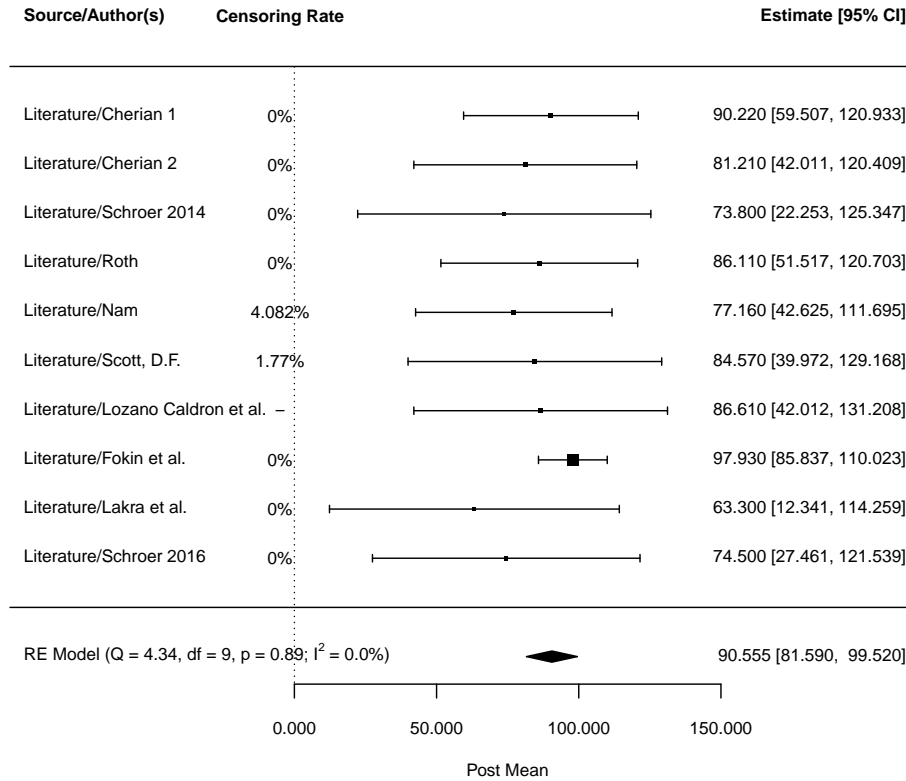

#### Leave-One-Out Diagnostics:

|    | estimate | se     | zval    | pval   | ci.lb   | ci.ub    | Q      | Qp     | tau2   | I2     | H2     |
|----|----------|--------|---------|--------|---------|----------|--------|--------|--------|--------|--------|
| 1  | 90.5861  | 4.7824 | 18.9416 | 0.0000 | 81.2128 | 99.9594  | 4.3398 | 0.8252 | 0.0000 | 0.0000 | 1.0000 |
| 2  | 91.0707  | 4.6986 | 19.3823 | 0.0000 | 81.8615 | 100.2798 | 4.1100 | 0.8471 | 0.0000 | 0.0000 | 1.0000 |
| 3  | 91.0775  | 4.6449 | 19.6081 | 0.0000 | 81.9737 | 100.1813 | 3.9218 | 0.8641 | 0.0000 | 0.0000 | 1.0000 |
| 4  | 90.8749  | 4.7359 | 19.1885 | 0.0000 | 81.5927 | 100.1571 | 4.2724 | 0.8318 | 0.0000 | 0.0000 | 1.0000 |
| 5  | 91.5228  | 4.7365 | 19.3229 | 0.0000 | 82.2395 | 100.8062 | 3.7207 | 0.8814 | 0.0000 | 0.0000 | 1.0000 |
| 6  | 90.8069  | 4.6694 | 19.4471 | 0.0000 | 81.6550 | 99.9588  | 4.2683 | 0.8321 | 0.0000 | 0.0000 | 1.0000 |
| 7  | 90.7210  | 4.6694 | 19.4287 | 0.0000 | 81.5691 | 99.8729  | 4.3090 | 0.8282 | 0.0000 | 0.0000 | 1.0000 |
| 8  | 81.5556  | 6.8156 | 11.9660 | 0.0000 | 68.1973 | 94.9139  | 1.1681 | 0.9969 | 0.0000 | 0.0000 | 1.0000 |
| 9  | 91.4254  | 4.6466 | 19.6758 | 0.0000 | 82.3182 | 100.5325 | 3.2064 | 0.9207 | 0.0000 | 0.0000 | 1.0000 |
| 10 | 91.1600  | 4.6595 | 19.5643 | 0.0000 | 82.0276 | 100.2925 | 3.8760 | 0.8681 | 0.0000 | 0.0000 | 1.0000 |

### 3.8 TKA OKS

Mean: 28.380; SE = 7.569; 95% CI: (13.546, 43.215); 99% CI: (8.884, 47.877)

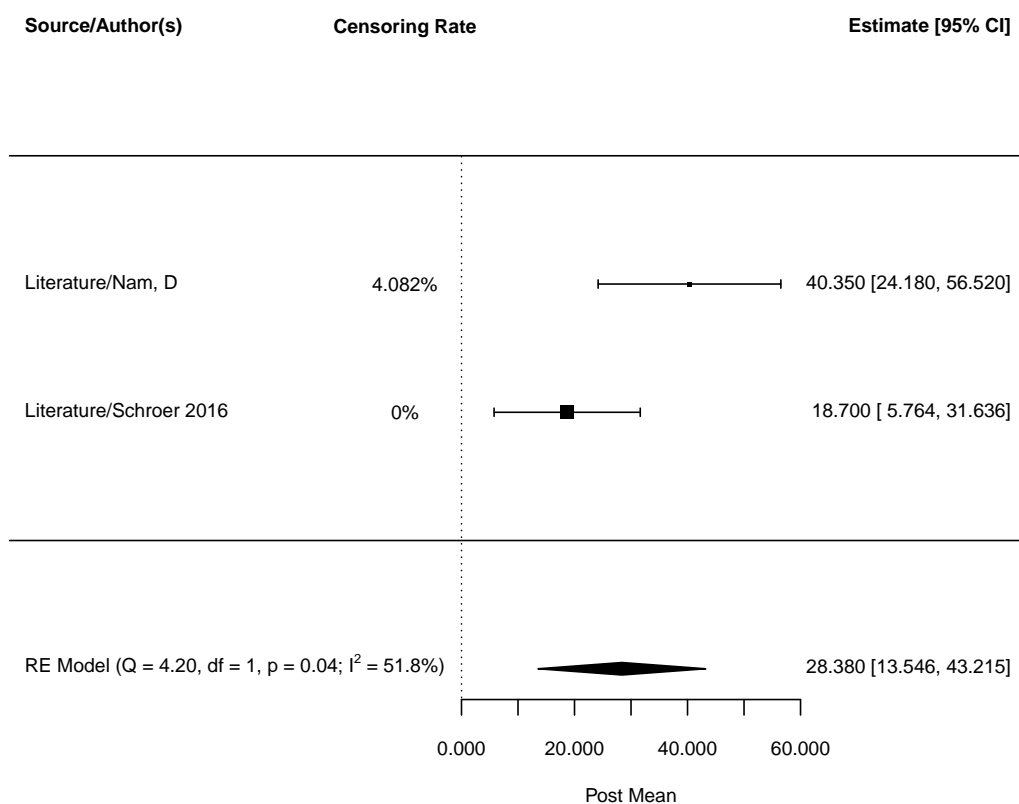

#### Leave-One-Out Diagnostics:

|   | estimate | se     | zval   | pval   | ci.lb   | ci.ub   | Q      | Qp     | tau2   | I2     | H2     |
|---|----------|--------|--------|--------|---------|---------|--------|--------|--------|--------|--------|
| 1 | 18.7000  | 6.6000 | 2.8333 | 0.0046 | 5.7642  | 31.6358 | 0.0000 | 1.0000 | 0.0000 | 0.0000 | 1.0000 |
| 2 | 40.3500  | 8.2500 | 4.8909 | 0.0000 | 24.1803 | 56.5197 | 0.0000 | 1.0000 | 0.0000 | 0.0000 | 1.0000 |

### 3.9 TKA EQ-5D

Mean: 0.840; SE = 0.106; 95% CI: (0.632, 1.048); 99% CI: (0.567, 1.113)

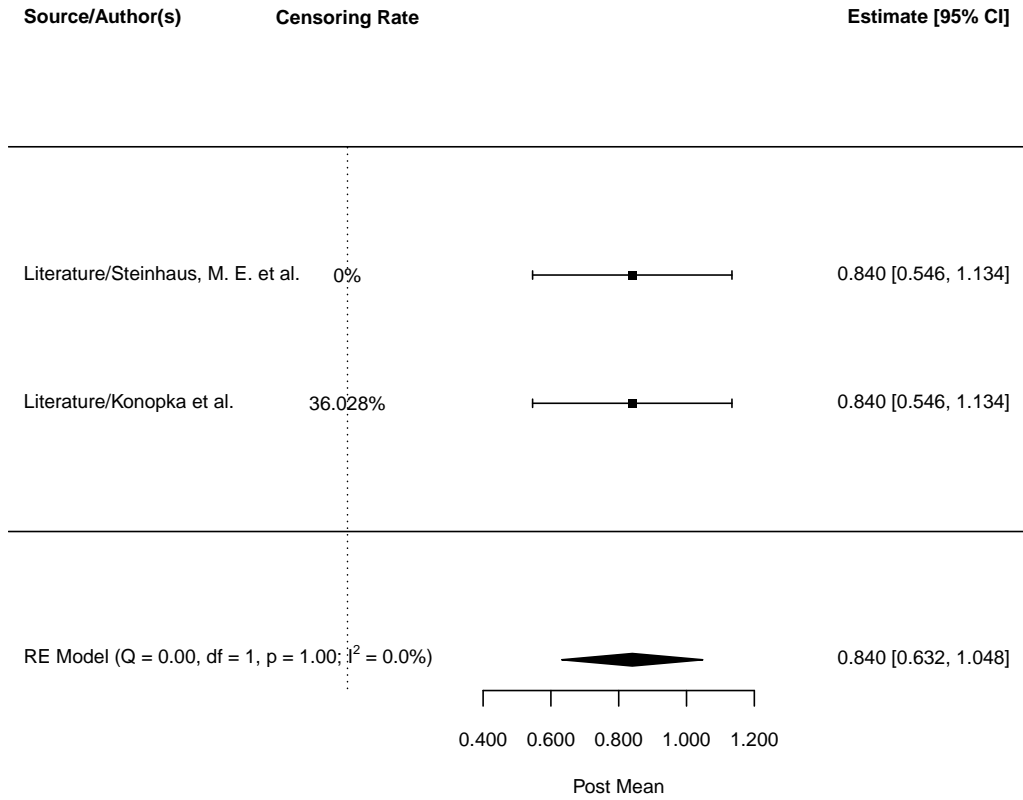

#### Leave-One-Out Diagnostics:

|   | estimate | se     | zval   | pval   | ci.lb  | ci.ub  | Q      | Qp     | tau2   | I2     | H2     |
|---|----------|--------|--------|--------|--------|--------|--------|--------|--------|--------|--------|
| 1 | 0.8400   | 0.1500 | 5.6000 | 0.0000 | 0.5460 | 1.1340 | 0.0000 | 1.0000 | 0.0000 | 0.0000 | 1.0000 |
| 2 | 0.8400   | 0.1500 | 5.6000 | 0.0000 | 0.5460 | 1.1340 | 0.0000 | 1.0000 | 0.0000 | 0.0000 | 1.0000 |

### 3.10 TKA SF-12 Physical

Mean: 41.907; SE = 0.912; 95% CI: (40.119, 43.694); 99% CI: (39.558, 44.255)

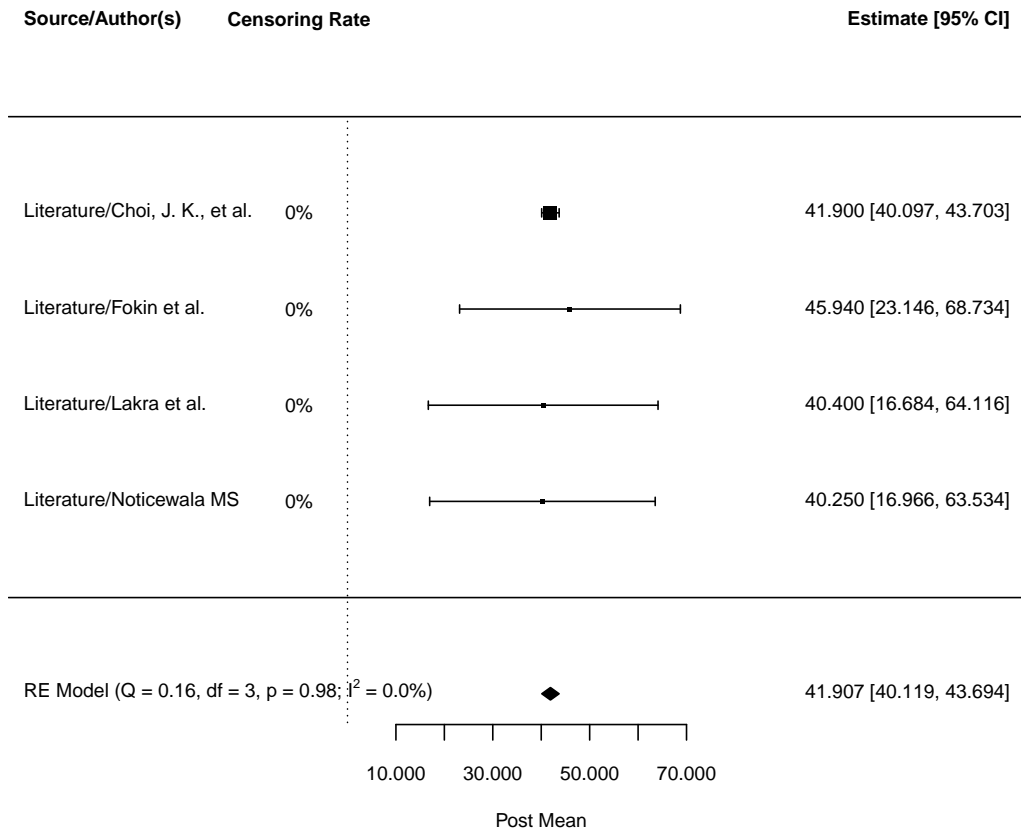

#### Leave-One-Out Diagnostics:

|   | estimate | se     | zval    | pval   | ci.lb   | ci.ub   | Q      | Qp     | tau2   | I2     | H2     |
|---|----------|--------|---------|--------|---------|---------|--------|--------|--------|--------|--------|
| 1 | 42.2723  | 6.8505 | 6.1707  | 0.0000 | 28.8456 | 55.6989 | 0.1524 | 0.9266 | 0.0000 | 0.0000 | 1.0000 |
| 2 | 41.8816  | 0.9146 | 45.7908 | 0.0000 | 40.0890 | 43.6743 | 0.0343 | 0.9830 | 0.0000 | 0.0000 | 1.0000 |
| 3 | 41.9152  | 0.9144 | 45.8383 | 0.0000 | 40.1230 | 43.7074 | 0.1397 | 0.9325 | 0.0000 | 0.0000 | 1.0000 |
| 4 | 41.9164  | 0.9145 | 45.8347 | 0.0000 | 40.1240 | 43.7088 | 0.1357 | 0.9344 | 0.0000 | 0.0000 | 1.0000 |



### 3.11 TKA SF-12 Mental

Mean: 51.601; SE = 0.755; 95% CI: (50.122, 53.080); 99% CI: (49.657, 53.545)

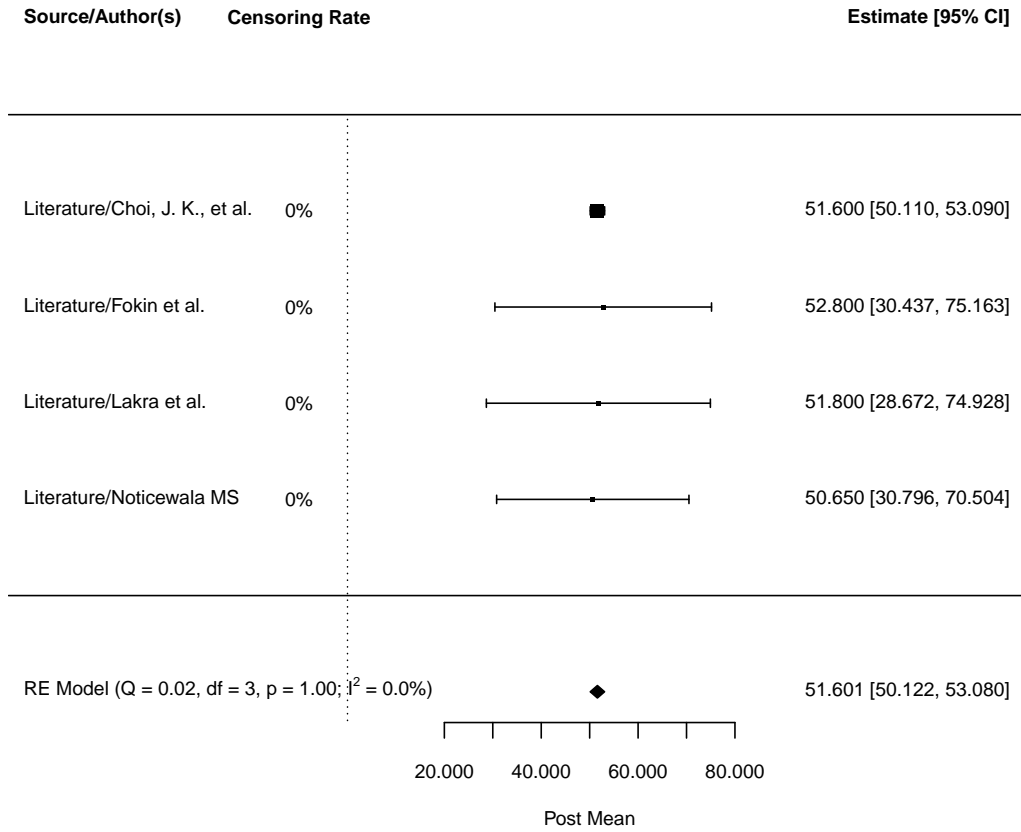

#### Leave-One-Out Diagnostics:

|   | estimate | se     | zval    | pval   | ci.lb   | ci.ub   | Q      | Qp     | tau2   | I2     | H2     |
|---|----------|--------|---------|--------|---------|---------|--------|--------|--------|--------|--------|
| 1 | 51.6567  | 6.3747 | 8.1034  | 0.0000 | 39.1625 | 64.1510 | 0.0201 | 0.9900 | 0.0000 | 0.0000 | 1.0000 |
| 2 | 51.5955  | 0.7563 | 68.2199 | 0.0000 | 50.1132 | 53.0779 | 0.0090 | 0.9955 | 0.0000 | 0.0000 | 1.0000 |
| 3 | 51.6000  | 0.7562 | 68.2355 | 0.0000 | 50.1178 | 53.0821 | 0.0199 | 0.9901 | 0.0000 | 0.0000 | 1.0000 |
| 4 | 51.6061  | 0.7568 | 68.1936 | 0.0000 | 50.1229 | 53.0893 | 0.0113 | 0.9944 | 0.0000 | 0.0000 | 1.0000 |

### 3.12 TKA SF-36 Physical

Mean: 46.675; SE = 3.431; 95% CI: (39.951, 53.399); 99% CI: (37.838, 55.512)

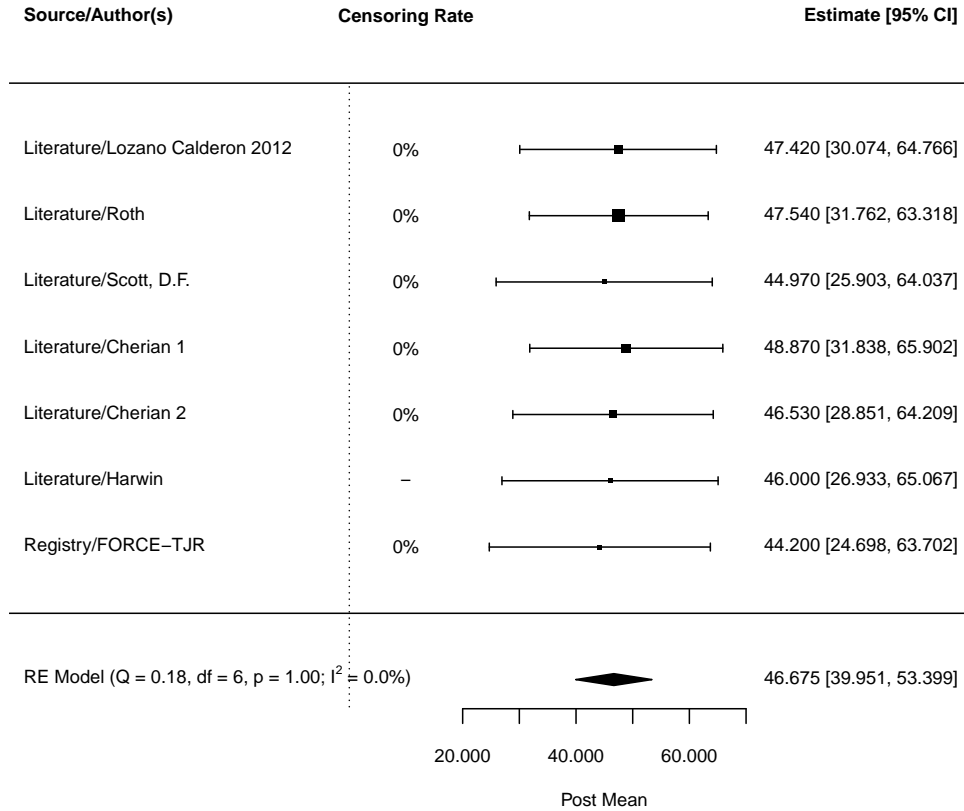

#### Leave-One-Out Diagnostics:

|   | estimate | se     | zval    | pval   | ci.lb   | ci.ub   | Q      | Qp     | tau2   | I2     | H2     |
|---|----------|--------|---------|--------|---------|---------|--------|--------|--------|--------|--------|
| 1 | 46.5432  | 3.7216 | 12.5061 | 0.0000 | 39.2489 | 53.8375 | 0.1718 | 0.9994 | 0.0000 | 0.0000 | 1.0000 |
| 2 | 46.4830  | 3.7922 | 12.2574 | 0.0000 | 39.0503 | 53.9156 | 0.1660 | 0.9994 | 0.0000 | 0.0000 | 1.0000 |
| 3 | 46.9171  | 3.6662 | 12.7973 | 0.0000 | 39.7315 | 54.1027 | 0.1450 | 0.9996 | 0.0000 | 0.0000 | 1.0000 |
| 4 | 46.2697  | 3.7339 | 12.3917 | 0.0000 | 38.9513 | 53.5880 | 0.1045 | 0.9998 | 0.0000 | 0.0000 | 1.0000 |
| 5 | 46.6995  | 3.7094 | 12.5895 | 0.0000 | 39.4292 | 53.9698 | 0.1798 | 0.9993 | 0.0000 | 0.0000 | 1.0000 |
| 6 | 46.7708  | 3.6662 | 12.7574 | 0.0000 | 39.5852 | 53.9564 | 0.1746 | 0.9994 | 0.0000 | 0.0000 | 1.0000 |
| 7 | 47.0089  | 3.6547 | 12.8624 | 0.0000 | 39.8457 | 54.1720 | 0.1099 | 0.9998 | 0.0000 | 0.0000 | 1.0000 |

### 3.13 TKA SF-36 Mental

Mean: 55.380; SE = 3.089; 95% CI: (49.327, 61.434); 99% CI: (47.425, 63.336)

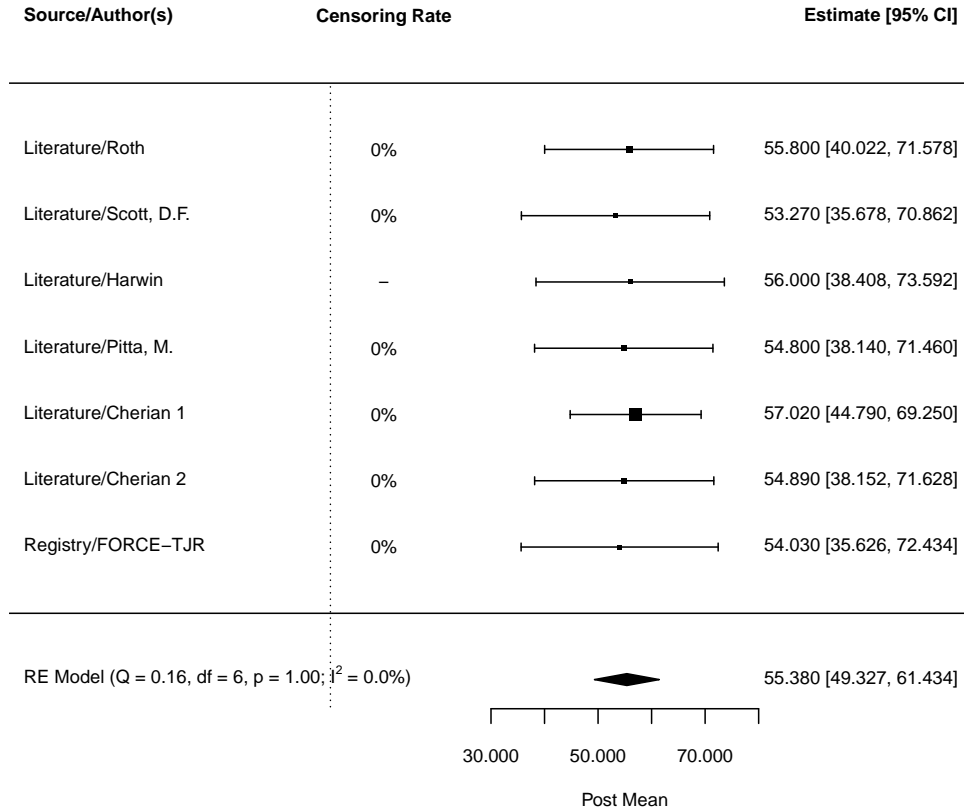

#### Leave-One-Out Diagnostics:

|   | estimate | se     | zval    | pval   | ci.lb   | ci.ub   | Q      | Qp     | tau2   | I2     | H2     |
|---|----------|--------|---------|--------|---------|---------|--------|--------|--------|--------|--------|
| 1 | 55.3080  | 3.3445 | 16.5372 | 0.0000 | 48.7530 | 61.8631 | 0.1573 | 0.9995 | 0.0000 | 0.0000 | 1.0000 |
| 2 | 55.6639  | 3.2894 | 16.9222 | 0.0000 | 49.2168 | 62.1110 | 0.0977 | 0.9998 | 0.0000 | 0.0000 | 1.0000 |
| 3 | 55.2972  | 3.2894 | 16.8107 | 0.0000 | 48.8501 | 61.7443 | 0.1550 | 0.9995 | 0.0000 | 0.0000 | 1.0000 |
| 4 | 55.4687  | 3.3151 | 16.7321 | 0.0000 | 48.9713 | 61.9662 | 0.1551 | 0.9995 | 0.0000 | 0.0000 | 1.0000 |
| 5 | 54.8485  | 3.5544 | 15.4310 | 0.0000 | 47.8819 | 61.8151 | 0.0690 | 0.9999 | 0.0000 | 0.0000 | 1.0000 |
| 6 | 55.4543  | 3.3128 | 16.7396 | 0.0000 | 48.9614 | 61.9471 | 0.1567 | 0.9995 | 0.0000 | 0.0000 | 1.0000 |
| 7 | 55.5443  | 3.2705 | 16.9834 | 0.0000 | 49.1342 | 61.9543 | 0.1373 | 0.9996 | 0.0000 | 0.0000 | 1.0000 |

## References

Furukawa, T. A., Barbui, C., Cipriani, A., Brambilla, P., and Watanabe, N. (2006). Imputing missing standard deviations in meta-analyses can provide accurate results. *Journal of clinical epidemiology*, 59(1):7–10.
